# Supplementary material for: Mitochondrial copper and phosphate transporter specificity was defined early in the evolution of eukaryotes
Source: eLife. 2021 Feb 16;10:e64690. doi: 10.7554/eLife.64690 (PMC7924939; doi:10.7554/eLife.64690)
Supplement: Supplementary file 1. [file elife-64690-supp1.xlsx]

## Sheet: Descriptions
Key to sheets
Genome datasets	List of genome accession number for the different eukaryotes analyzed in this study
All MCF accession	Accession numbers of all transcripts with at least 1 MCF PFAM domain from all genomes listed in sheet "Genomes"
Ortholog Table	Accession numbers of PIC2/MIR1 orthologs. The accession that were removed from the analysis as duplicate sequnces/isoforms are shown in column named "highly similar sequences"; N.B. All trees calculated for each taxa avaiable on request.
Position summary	The entropy scores for PIC2 and MIR1
	Column	Description
	Position	Muscle aligniment position
	ScPIC2 aa	Residue in S. cerevisiae PIC2: mutants made in this study in Fig 6 are shown in BOLD mutants in Figure 6 supplement 3 are in ITALICS, P(D/E)XX(R/K) conserved motifs are shaded in yellow, (Y/F)(D/E)XX(R/K) motif shaded in green, Gly and small amino acid motifs are shaded in in violet.
	ScPIC2 pos	Position number in ScPIC2
	PIC2 entropy	Entropy score for PIC2 clade (min:0 to max: 3.6)
	PIC2 aa	Consensus residue for PIC2 clade
	ScMIR1 Pos	Position number in ScMIR1
	ScMIR1 aa	Residue in S. cerevisiae MIR1
	MIR1 entropy	Entropy score for MIR1 clade (min:0 to max: 3.6)
	MIR1 aa	Consensus residue for MIR1 clade
	Same	Binary score of 0= different residue 1= matching residue between PIC2 and MIR1
	Secondary structure	Transmembrane helix (TMH) number
	Motifs	All MCFs have six transmembrane helices with conserved PX(D/E)XX(R/K) and πGπxπGπ motifs in the odd-numbered helices (where X is any amino-acid and π is any amino-acid with a small side chain) and (Y/F)(D/E)XX(R/K) and πXXXXπ motifs in the even-numbered helices [3]
	Identity	Predicted residue based on conserved motifs.
Modelled Structure	Image of c-state model with individual helices colored.
MSA for Model	Mulitple sequence alignment used for determining insertions and deletions and boundaries secondary structure elements.
Mutants	Oligonucleotides used to mutate residues in this study.

## Sheet: Genome Datasets
Group	Species	Genome Identifier	Authors	Year	Dataset Title	Dataset url
Opisthokonta	Drosophila melanogaster	GCA_000001215.4	The FlyBase Consortium	2014	Release 6 plus ISO1 MT	https://www.ncbi.nlm.nih.gov/assembly/GCA_000001215.4
Opisthokonta	Homo sapiens	GCA_000001405.3	Genome Reference Consortium	2010	GRCh37.p2	https://www.ncbi.nlm.nih.gov/assembly/GCA_000001405.3
Chloroplastida	Arabidopsis thaliana	GCA_000001735.2	The Arabidopsis Information Resource (TAIR)	2018	TAIR10.1	https://www.ncbi.nlm.nih.gov/assembly/GCA_000001735.2
Opisthokonta	Danio rerio	GCA_000002035.4	Genome Reference Consortium	2017	Genome Reference Consortium Zebrafish Build 11	https://www.ncbi.nlm.nih.gov/assembly/GCA_000002035.4
Opisthokonta	Strongylocentrotus purpuratus	GCA_000002235.4	The Sea Urchin Genome Project	2019	Spur_5.0	https://www.ncbi.nlm.nih.gov/assembly/GCA_000002235.4
Metamonada	Giardia intestinalis	GCA_000002435.2	Morrison,H.G., McArthur,A.G., Gillin,F.D., Aley,S.B., Adam,R.D., Olsen,G.J., Best,A.A., Cande,W.Z., Chen,F., Cipriano,M.J., Davids,B.J., Dawson,S.C., Elmendorf,H.G., Hehl,A.B., Holder,M.E., Huse,S.M., Kim,U.U., Lasek-Nesselquist,E., Manning,G., Nigam,A., Nixon,J.E., Palm,D., Passamaneck,N.E., Prabhu,A., Reich,C.I., Reiner,D.S., Samuelson,J., Svard,S.G. and Sogin,M.L.	2019	UU_WB_2.1	https://www.ncbi.nlm.nih.gov/assembly/GCA_000002435.2
Chloroplastida	Chlamydomonas reinhardtii	GCA_000002595.2	Merchant,S.S., Prochnik,S.E., Vallon,O., Harris,E.H., Karpowicz,S.J., Witman,G.B., Terry,A., Salamov,A., Fritz-Laylin,L.K., Marechal-Drouard,L., Marshall,W.F., Qu,L.H., Nelson,D.R., Sanderfoot,A.A., Spalding,M.H., Kapitonov,V.V., Ren,Q., Ferris,P., Lindquist,E., Shapiro,H., Lucas,S.M., Grimwood,J., Schmutz,J., Cardol,P., Cerutti,H., Chanfreau,G., Chen,C.L., Cognat,V., Croft,M.T., Dent,R., Dutcher…	2014	Chlamydomonas reinhardtii (green algae), v3.0	https://www.ncbi.nlm.nih.gov/assembly/GCA_000002595.2
Discoba	Leishmania major	GCA_000002725.2	Alasdair C Ivens , Christopher S Peacock, Elizabeth A Worthey, Lee Murphy, Gautam Aggarwal, Matthew Berriman, Ellen Sisk, Marie-Adele Rajandream, Ellen Adlem, Rita Aert, Atashi Anupama, Zina Apostolou, Philip Attipoe, Nathalie Bason, Christopher Bauser, Alfred Beck, Stephen M Beverley, Gabriella Bianchettin, Katja Borzym, Gordana Bothe, Carlo V Bruschi, Matt Collins, Eithon Cadag, Laura Ciarloni,…	2011	ASM272v2	https://www.ncbi.nlm.nih.gov/assembly/GCA_000002725.2
Alveolata	Plasmodium falciparum	GCA_000002765.5	Plasmodium falciparum Genome Sequencing Consortium	2016	GCA_000002765	https://www.ncbi.nlm.nih.gov/assembly/GCA_000002765.5
Opisthokonta	Monosiga brevicollis	GCA_000002865.1	King,N., Westbrook,M.J., Young,S.L., Kuo,A., Abedin,M., Chapman,J., Fairclough,S., Hellsten,U., Isogai,Y., Letunic,I., Marr,M., Pincus,D., Putnam,N., Rokas,A., Wright,K.J., Zuzow,R., Dirks,W., Good,M., Goodstein,D., Lemons,D., Li,W., Lyons,J.B., Morris,A., Nichols,S., Richter,D.J., Salamov,A., Sequencing,J.G., Bork,P., Lim,W.A., Manning,G., Miller,W.T., McGinnis,W., Shapiro,H., Tjian,R., Grigorie…	2007	Monosiga brevicollis MX1 (choanoflagellates) v1.0	https://www.ncbi.nlm.nih.gov/assembly/GCA_000002865.1
Cryptophyta	Guillardia theta	GCA_000002975.1	S Douglas , S Zauner, M Fraunholz, M Beaton, S Penny, L T Deng, X Wu, M Reith, T Cavalier-Smith, U G Maier	2001	ASM297v1	https://www.ncbi.nlm.nih.gov/assembly/GCA_000002975.1
Amoebozoa	Dictyostelium discoideum	GCA_000004695.1	The Dictyostelium discoideum Sequencing Consortium	2005	Dictyostelium discoideum AX4	https://www.ncbi.nlm.nih.gov/assembly/GCA_000004695.1
Discoba	Naegleria gruberi	GCA_000004985.1	Fritz-Laylin,L.K., Prochnik,S.E., Ginger,M.L., Dacks,J.B., Carpenter,M.L., Field,M.C., Kuo,A., Paredez,A., Chapman,J., Pham,J., Shu,S., Neupane,R., Cipriano,M., Mancuso,J., Tu,H., Salamov,A., Lindquist,E., Shapiro,H., Lucas,S., Grigoriev,I.V., Cande,W.Z., Fulton,C., Rokhsar,D.S. and Dawson,S.C.	2010	Naegleria gruberi strain NEG-M, v1.0	https://www.ncbi.nlm.nih.gov/assembly/GCA_000004985.1
Alveolata	Perkinsus marinus	GCA_000006405.1	El-Sayed,N., Caler,E., Inman,J., Amedeo,P., Hass,B., Wortman,J., Gardner,M., Fernandez-Robledo,J.A. and Vasta,G.R.	2008	JCVI_PMG_1.0	https://www.ncbi.nlm.nih.gov/assembly/GCA_000006405.1
Alveolata	Toxoplasma gondii	GCA_000006565.2	Lorenzi,H., Caler,E., Galinsky,K., Schobel,S. and Paulsen,I.	2013	TGA4	https://www.ncbi.nlm.nih.gov/assembly/GCA_000006565.2
Opisthokonta	Amphimedon queenslandica	GCA_000090795.1	Srivastava,M., Simakov,O., Chapman,J., Fahey,B., Gauthier,M.E., Mitros,T., Richards,G.S., Conaco,C., Dacre,M., Hellsten,U., Larroux,C., Putnam,N.H., Stanke,M., Adamska,M., Darling,A., Degnan,S.M., Oakley,T.H., Plachetzki,D.C., Zhai,Y., Adamski,M., Calcino,A., Cummins,S.F., Goodstein,D.M., Harris,C., Jackson,D.J., Leys,S.P., Shu,S., Woodcroft,B.J., Vervoort,M., Kosik,K.S., Manning,G., Degnan,B.M. …	2010	Amphimedon queenslandica v1.0	https://www.ncbi.nlm.nih.gov/assembly/GCA_000090795.1
Chloroplastida	Micromonas commoda	GCA_000090985.2	Micromonas genome consortium	2009	ASM9098v2	https://www.ncbi.nlm.nih.gov/assembly/GCA_000090985.2
Rhodophyta	Cyanidioschyzon merolae	GCA_000091205.1	National Institute of Genetics, Japan	2007	ASM9120v1	https://www.ncbi.nlm.nih.gov/assembly/GCA_000091205.1
Apusomonadida	Thecamonas trahens	GCA_000142905.1	The Broad Institute Genome Sequencing Platform	2010	TheTra_May2010	https://www.ncbi.nlm.nih.gov/assembly/GCA_000142905.1
Opisthokonta	Rhizopus delemar	GCA_000149305.1	Ma,L.J., Ibrahim,A.S., Skory,C., Grabherr,M.G., Burger,G., Butler,M., Elias,M., Idnurm,A., Lang,B.F., Sone,T., Abe,A., Calvo,S.E., Corrochano,L.M., Engels,R., Fu,J., Hansberg,W., Kim,J.M., Kodira,C.D., Koehrsen,M.J., Liu,B., Miranda-Saavedra,D., O'Leary,S., Ortiz-Castellanos,L., Poulter,R., Rodriguez-Romero,J., Ruiz-Herrera,J., Shen,Y.Q., Zeng,Q., Galagan,J., Birren,B.W., Cuomo,C.A. and Wickes,B.…	2009	RO3	https://www.ncbi.nlm.nih.gov/assembly/GCA_000149305.1
Stramenopiles	Thalassiosira pseudonana	GCA_000149405.2	Armbrust,E.V., Berges,J.A., Bowler,C., Green,B.R., Martinez,D., Putnam,N.H., Zhou,S., Allen,A.E., Apt,K.E., Bechner,M., Brzezinski,M.A., Chaal,B.K., Chiovitti,A., Davis,A.K., Demarest,M.S., Detter,J.C., Glavina,T., Goodstein,D., Hadi,M.Z., Hellsten,U., Hildebrand,M., Jenkins,B.D., Jurka,J., Kapitonov,V.V., Kroger,N., Lau,W.W., Lane,T.W., Larimer,F.W., Lippmeier,J.C., Lucas,S., Medina,M., Montsant…	2009	ASM14940v2	https://www.ncbi.nlm.nih.gov/assembly/GCA_000149405.2
Stramenopiles	Phaeodactylum tricornutum	GCA_000150955.2	Bowler,C., Allen,A.E., Badger,J.H., Grimwood,J., Jabbari,K., Kuo,A., Maheswari,U., Martens,C., Maumus,F., Otillar,R.P., Rayko,E., Salamov,A., Vandepoele,K., Beszteri,B., Gruber,A., Heijde,M., Katinka,M., Mock,T., Valentin,K., Verret,F., Berges,J.A., Brownlee,C., Cadoret,J.P., Chiovitti,A., Choi,C.J., Coesel,S., De Martino,A., Detter,J.C., Durkin,C., Falciatore,A., Fournet,J., Haruta,M., Huysman,M…	2008	ASM15095v2	https://www.ncbi.nlm.nih.gov/assembly/GCA_000150955.2
Opisthokonta	Capsaspora owczarzaki	GCA_000151315.2	The Broad Institute Genome Sequencing Platform	2013	C_owczarzaki_V2	https://www.ncbi.nlm.nih.gov/assembly/GCA_000151315.2
Stramenopiles	Blastocystis hominis	GCA_000151665.1	Wincker,P.	2010	ASM15166v1	https://www.ncbi.nlm.nih.gov/assembly/GCA_000151665.1
Alveolata	Cryptosporidium parvum	GCA_000165345.1	Abrahamsen,M.S., Templeton,T.J., Enomoto,S., Abrahante,J.E., Zhu,G., Lancto,C.A., Deng,M., Liu,C., Widmer,G., Tzipori,S., Buck,G.A., Xu,P., Bankier,A.T., Dear,P.H., Konfortov,B.A., Spriggs,H.F., Iyer,L., Anantharaman,V., Aravind,L. and Kapur,V.	2004	ASM16534v1 - representative genome	https://www.ncbi.nlm.nih.gov/assembly/GCA_000165345.1
Alveolata	Paramecium tetraurelia	GCA_000165425.1	Aury,J.-M., Jaillon,O., Duret,L., Noel,B., Jubin,C., Porcel,B.M., Segurens,B., Daubin,V., Anthouard,V., Aiach,N., Arnaiz,O., Billaut,A., Beisson,J., Blanc,I., Bouhouche,K., Camara,F., Duharcourt,S., Guigo,R., Gogendeau,D., Katinka,M., Keller,A.-M., Kissmehl,R., Klotz,C., Koll,F., Le Mouel,A., Lepere,C., Malinsky,S., Nowacki,M., Nowak,J.K., Plattner,H., Poulain,J., Ruiz,F., Serrano,V., Zagulski,M.…	2006	ASM16542v1	https://www.ncbi.nlm.nih.gov/assembly/GCA_000165425.1
Opisthokonta	Spizellomyces punctatus	GCA_000182565.2	The Broad Institute Genome Sequencing Platform	2015	S_punctatus_V1	https://www.ncbi.nlm.nih.gov/assembly/GCA_000182565.2
Opisthokonta	Neurospora crassa	GCA_000182925.2	Galagan,J.E., Calvo,S.E., Borkovich,K.A., Selker,E.U., Read,N.D., Jaffe,D., FitzHugh,W., Ma,L.J., Smirnov,S., Purcell,S., Rehman,B., Elkins,T., Engels,R., Wang,S., Nielsen,C.B., Butler,J., Endrizzi,M., Qui,D., Ianakiev,P., Bell-Pedersen,D., Nelson,M.A., Werner-Washburne,M., Selitrennikoff,C.P., Kinsey,J.A., Braun,E.L., Zelter,A., Schulte,U., Kothe,G.O., Jedd,G., Mewes,W., Staben,C., Marcotte,E., …	2013	NC12	https://www.ncbi.nlm.nih.gov/assembly/GCA_000182925.2
Alveolata	Tetrahymena thermophila	GCA_000189635.1	Bidwell,S., Michalis,H.M., Zafar,N., Joardar,V., Miao,W., Russ,C., Eisen,J., Wu,M., Wu,D., Nierman,W., Orias,E., Delcher,A., Salzberg,S. and Coyne,R.	2009	JCVI-TTA1-2.2	https://www.ncbi.nlm.nih.gov/assembly/GCA_000189635.1
Discoba	Trypanosoma brucei	GCA_000210295.1	Andrew P Jackson , Mandy Sanders, Andrew Berry, Jacqueline McQuillan, Martin A Aslett, Michael A Quail, Bridget Chukualim, Paul Capewell, Annette MacLeod, Sara E Melville, Wendy Gibson, J David Barry, Matthew Berriman, Christiane Hertz-Fowler	2009	ASM21029v1	https://www.ncbi.nlm.nih.gov/assembly/GCA_000210295.1
Amoebozoa	Acanthamoeba castellanii	GCA_000313135.1	Clarke,M., Lohan,A.J., Liu,B., Lagkouvardos,I., Roy,S., Zafar,N., Bertelli,C., Schilde,C., Kianianmomeni,A., Burglin,T.R., Frech,C., Turcotte,B., Kopec,K.O., Synnott,J.M., Choo,C., Paponov,I., Finkler,A., Soon Heng Tan,C., Hutchins,A.P., Weinmeier,T., Rattei,T., Chu,J.S., Gimenez,G., Irimia,M., Rigden,D.J., Fitzpatrick,D.A., Lorenzo-Morales,J., Bateman,A., Chiu,C.H., Tang,P., Hegemann,P., Fromm,H…	2013	Acastellanii.strNEFF v1	https://www.ncbi.nlm.nih.gov/assembly/GCA_000313135.1
Opisthokonta	Ustilago maydis	GCA_000328475.2	Kamper,J., Kahmann,R., Bolker,M., Ma,L.J., Brefort,T., Saville,B.J., Banuett,F., Kronstad,J.W., Gold,S.E., Muller,O., Perlin,M.H., Wosten,H.A., de Vries,R., Ruiz-Herrera,J., Reynaga-Pena,C.G., Snetselaar,K., McCann,M., Perez-Martin,J., Feldbrugge,M., Basse,C.W., Steinberg,G., Ibeas,J.I., Holloman,W., Guzman,P., Farman,M., Stajich,J.E., Sentandreu,R., Gonzalez-Prieto,J.M., Kennell,J.C., Molina,L.,…	2015	Umaydis521_2.0	https://www.ncbi.nlm.nih.gov/assembly/GCA_000328475.2
Rhodophyta	Chondrus crispus	GCA_000350225.2	Collen,J., Porcel,B., Carre,W., Ball,S.G., Chaparro,C., Tonon,T., Barbeyron,T., Michel,G., Noel,B., Valentin,K., Elias,M., Artiguenave,F., Arun,A., Aury,J.M., Barbosa-Neto,J.F., Bothwell,J.H., Bouget,F.Y., Brillet,L., Cabello-Hurtado,F., Capella-Gutierrez,S., Charrier,B., Cladiere,L., Cock,J.M., Coelho,S.M., Colleoni,C., Czjzek,M., Da Silva,C., Delage,L., Denoeud,F., Deschamps,P., Dittami,S.M., G…	2013	ASM35022v2	https://www.ncbi.nlm.nih.gov/assembly/GCA_000350225.2
Haptophyta	Emiliania huxleyi	GCA_000372725.1	Emiliania huxleyi Annotation Consortium	2013	Emiliana huxleyi CCMP1516 main genome assembly v1.0	https://www.ncbi.nlm.nih.gov/assembly/GCA_000372725.1
Opisthokonta	Fonticula alba	GCA_000388065.2	The Broad Institute Genomics Platform	2014	Font_alba_ATCC_38817_V2	https://www.ncbi.nlm.nih.gov/assembly/GCA_000388065.2
Metamonada	Spironucleus salmonicida	GCA_000497125.1	Xu,F., Jerlstrom-Hultqvist,J., Einarsson,E., Astvaldsson,A., Svard,S.G. and Andersson,J.O.	2013	SSK3.0	https://www.ncbi.nlm.nih.gov/assembly/GCA_000497125.1
Rhizaria	Reticulomyxa filosa	GCA_000512085.1	Glockner,G., Hulsmann,N., Schleicher,M., Noegel,A.A., Eichinger,L., Gallinger,C., Pawlowski,J., Sierra,R., Euteneuer,U., Pillet,L., Moustafa,A., Platzer,M., Groth,M., Szafranski,K. and Schliwa,M.	2013	Reti_assembly1.0	https://www.ncbi.nlm.nih.gov/assembly/GCA_000512085.1
Haptophyta	Chrysochromulina tobinii	GCA_001275005.1	Hovde,B.T., Starkenburg,S.R. and Cattolico,R.A.	2015	Ctobinv2	https://www.ncbi.nlm.nih.gov/assembly/GCA_001275005.1
Metamonada	Tritrichomonas foetus	GCA_001839685.1	Benchimol,M., Almeida,L.G., Vasconcelos,A.T., Perreira-Neves,A., Rosa,I.A., Tasca,T., Bogo,M.R. and de Souza,W.	2016	ASM183968v1	https://www.ncbi.nlm.nih.gov/assembly/GCA_001839685.1
Metamonada	Trichomonas vaginalis	GCA_002891335.1	Kuo,D.	2018	ASM289133v1	https://www.ncbi.nlm.nih.gov/assembly/GCA_002891335.1
Opisthokonta	Saccharomyces cerevisiae	GCA_003086655.1	Frasergen bioinfomatics	2018	ASM308665v1	https://www.ncbi.nlm.nih.gov/assembly/GCA_003086655.1
Metamonada	Kipferlia bialata	GCA_003568945.1	Tanifuji,G., Takabayashi,S., Kume,K., Takagi,M., Nakayama,T., Kamikawa,R., Inagaki,Y. and Hashimoto,T.	2018	KIPB_1.0	https://www.ncbi.nlm.nih.gov/assembly/GCA_003568945.1
Metamonada	Giardia muris	GCA_006247105.1	Xu,F., Jimenez-Gonzalez,A., Einarsson,E., Astvaldsson,A., Peirasmaki,D., Eckmann,L., Andersson,J.O., Svard,S.G. and Jerlstrom-Hultqvist,J.	2019	UU_GM_1.1	https://www.ncbi.nlm.nih.gov/assembly/GCA_006247105.1
Metamonada	Streblomastix strix	GCA_008636045.1	Treitli,S.C., Kolisko,M., Husnik,F., Keeling,P. and Hampl,V.	2019	CUV_Sstr_1.0	https://www.ncbi.nlm.nih.gov/assembly/GCA_008636045.1
Rhodophyta	Porphyridium purpureum	GCA_008690995.1	Lee,J.	2019	P_purpureum_CCMP1328_Hybrid_assembly	https://www.ncbi.nlm.nih.gov/assembly/GCA_008690995.1
Chloroplastida	Oryza sativa	GCF_000005425.2	International Rice Genome Sequencing Project	2009	The IRGSP pseudomolecules (Build 4.0)	https://www.ncbi.nlm.nih.gov/assembly/GCF_000005425.2

## Sheet: All MCF accession
Species	Accession Number
Acanthamoeba castellanii	XP_004332909.1
Acanthamoeba castellanii	XP_004341141.1
Acanthamoeba castellanii	XP_004338112.1
Acanthamoeba castellanii	XP_004348726.1
Acanthamoeba castellanii	XP_004344612.1
Acanthamoeba castellanii	XP_004338972.1
Acanthamoeba castellanii	XP_004339227.1
Acanthamoeba castellanii	XP_004368227.1
Acanthamoeba castellanii	XP_004333929.1
Acanthamoeba castellanii	XP_004336457.1
Acanthamoeba castellanii	XP_004340792.1
Acanthamoeba castellanii	XP_004353082.1
Acanthamoeba castellanii	XP_004336347.1
Acanthamoeba castellanii	XP_004352934.1
Acanthamoeba castellanii	XP_004353185.1
Acanthamoeba castellanii	XP_004339053.1
Acanthamoeba castellanii	XP_004336065.1
Acanthamoeba castellanii	XP_004335603.1
Acanthamoeba castellanii	XP_004335033.1
Acanthamoeba castellanii	XP_004346566.1
Acanthamoeba castellanii	XP_004354014.1
Acanthamoeba castellanii	XP_004347766.1
Acanthamoeba castellanii	XP_004343964.1
Acanthamoeba castellanii	XP_004367594.1
Acanthamoeba castellanii	XP_004356623.1
Acanthamoeba castellanii	XP_004337968.1
Acanthamoeba castellanii	XP_004341712.1
Acanthamoeba castellanii	XP_004356448.1
Acanthamoeba castellanii	XP_004334198.1
Acanthamoeba castellanii	XP_004333401.1
Acanthamoeba castellanii	XP_004337440.1
Acanthamoeba castellanii	XP_004339616.1
Acanthamoeba castellanii	XP_004344906.1
Acanthamoeba castellanii	XP_004340152.1
Acanthamoeba castellanii	XP_004336765.1
Acanthamoeba castellanii	XP_004336818.1
Acanthamoeba castellanii	XP_004346550.1
Acanthamoeba castellanii	XP_004337339.1
Acanthamoeba castellanii	XP_004333673.1
Acanthamoeba castellanii	XP_004333332.1
Acanthamoeba castellanii	XP_004338547.1
Acanthamoeba castellanii	XP_004336805.1
Acanthamoeba castellanii	XP_004367698.1
Acanthamoeba castellanii	XP_004341125.1
Acanthamoeba castellanii	XP_004333906.1
Acanthamoeba castellanii	XP_004333064.1
Acanthamoeba castellanii	XP_004367581.1
Acanthamoeba castellanii	XP_004334938.1
Acanthamoeba castellanii	XP_004338908.1
Acanthamoeba castellanii	XP_004337812.1
Acanthamoeba castellanii	XP_004341723.1
Acanthamoeba castellanii	XP_004352664.1
Acanthamoeba castellanii	XP_004356622.1
Acanthamoeba castellanii	XP_004344643.1
Acanthamoeba castellanii	XP_004350025.1
Acanthamoeba castellanii	XP_004336780.1
Acanthamoeba castellanii	XP_004334937.1
Acanthamoeba castellanii	XP_004358249.1
Acanthamoeba castellanii	XP_004336812.1
Acanthamoeba castellanii	XP_004340476.1
Acanthamoeba castellanii	XP_004334374.1
Acanthamoeba castellanii	XP_004332922.1
Acanthamoeba castellanii	XP_004336520.1
Acanthamoeba castellanii	XP_004341311.1
Acanthamoeba castellanii	XP_004337470.1
Acanthamoeba castellanii	XP_004356607.1
Acanthamoeba castellanii	XP_004338372.1
Acanthamoeba castellanii	XP_004342185.1
Acanthamoeba castellanii	XP_004367701.1
Acanthamoeba castellanii	XP_004336817.1
Acanthamoeba castellanii	XP_004338255.1
Acanthamoeba castellanii	XP_004341820.1
Acanthamoeba castellanii	XP_004342002.1
Acanthamoeba castellanii	XP_004352740.1
Acanthamoeba castellanii	XP_004340548.1
Acanthamoeba castellanii	XP_004334396.1
Acanthamoeba castellanii	XP_004348599.1
Acanthamoeba castellanii	XP_004333911.1
Acanthamoeba castellanii	XP_004337125.1
Acanthamoeba castellanii	XP_004346053.1
Acanthamoeba castellanii	XP_004333947.1
Acanthamoeba castellanii	XP_004339369.1
Acanthamoeba castellanii	XP_004337374.1
Acanthamoeba castellanii	XP_004337570.1
Acanthamoeba castellanii	XP_004341855.1
Acanthamoeba castellanii	XP_004333744.1
Acanthamoeba castellanii	XP_004367591.1
Acanthamoeba castellanii	XP_004348598.1
Amphimedon queenslandica	XP_019855215.1
Amphimedon queenslandica	XP_019855214.1
Amphimedon queenslandica	XP_019850971.1
Amphimedon queenslandica	XP_003382431.1
Amphimedon queenslandica	XP_003382921.2
Amphimedon queenslandica	XP_003390789.1
Amphimedon queenslandica	XP_003387458.1
Amphimedon queenslandica	XP_003387955.1
Amphimedon queenslandica	XP_011406045.2
Amphimedon queenslandica	XP_003386163.1
Amphimedon queenslandica	XP_003383517.1
Amphimedon queenslandica	XP_019849641.1
Amphimedon queenslandica	XP_003386483.1
Amphimedon queenslandica	XP_019849034.1
Amphimedon queenslandica	XP_019848686.1
Amphimedon queenslandica	XP_003387556.1
Amphimedon queenslandica	XP_003389716.2
Amphimedon queenslandica	XP_019851437.1
Amphimedon queenslandica	XP_019849631.1
Amphimedon queenslandica	XP_019849637.1
Amphimedon queenslandica	XP_003386705.1
Amphimedon queenslandica	XP_019852144.1
Amphimedon queenslandica	XP_003382862.1
Amphimedon queenslandica	XP_003382993.1
Amphimedon queenslandica	XP_019849647.1
Amphimedon queenslandica	XP_003390974.2
Amphimedon queenslandica	XP_003382976.1
Amphimedon queenslandica	XP_003382773.2
Amphimedon queenslandica	XP_011410181.1
Amphimedon queenslandica	XP_003387564.2
Amphimedon queenslandica	XP_011407770.1
Amphimedon queenslandica	XP_011409833.1
Amphimedon queenslandica	XP_003383421.1
Amphimedon queenslandica	XP_003386558.1
Amphimedon queenslandica	XP_003388570.1
Amphimedon queenslandica	XP_011409465.1
Amphimedon queenslandica	XP_003386557.1
Amphimedon queenslandica	XP_003389171.2
Amphimedon queenslandica	XP_011409509.1
Amphimedon queenslandica	XP_011409068.1
Amphimedon queenslandica	XP_003382624.1
Amphimedon queenslandica	XP_019853220.1
Amphimedon queenslandica	XP_003382381.1
Amphimedon queenslandica	XP_019853175.1
Amphimedon queenslandica	XP_019858583.1
Arabidopsis thaliana	NP_001190650.1
Arabidopsis thaliana	NP_192019.1
Arabidopsis thaliana	NP_566102.1
Arabidopsis thaliana	NP_001321077.1
Arabidopsis thaliana	NP_564233.1
Arabidopsis thaliana	NP_001328407.1
Arabidopsis thaliana	NP_181325.2
Arabidopsis thaliana	NP_199918.2
Arabidopsis thaliana	NP_190962.2
Arabidopsis thaliana	NP_194966.1
Arabidopsis thaliana	NP_196349.1
Arabidopsis thaliana	NP_566683.1
Arabidopsis thaliana	NP_001327267.1
Arabidopsis thaliana	NP_001032121.1
Arabidopsis thaliana	NP_199708.1
Arabidopsis thaliana	NP_568940.1
Arabidopsis thaliana	NP_001320068.1
Arabidopsis thaliana	NP_177564.2
Arabidopsis thaliana	NP_180577.1
Arabidopsis thaliana	NP_172184.1
Arabidopsis thaliana	NP_568894.1
Arabidopsis thaliana	NP_001319759.1
Arabidopsis thaliana	NP_191123.1
Arabidopsis thaliana	NP_001031876.1
Arabidopsis thaliana	NP_196853.1
Arabidopsis thaliana	NP_569032.1
Arabidopsis thaliana	NP_195770.1
Arabidopsis thaliana	NP_187470.1
Arabidopsis thaliana	NP_850541.1
Arabidopsis thaliana	NP_190755.2
Arabidopsis thaliana	NP_172908.1
Arabidopsis thaliana	NP_172866.1
Arabidopsis thaliana	NP_001328166.1
Arabidopsis thaliana	NP_194568.1
Arabidopsis thaliana	NP_001332469.1
Arabidopsis thaliana	NP_001332470.1
Arabidopsis thaliana	NP_568670.1
Arabidopsis thaliana	NP_190979.1
Arabidopsis thaliana	NP_195754.1
Arabidopsis thaliana	NP_001329416.1
Arabidopsis thaliana	NP_001321798.1
Arabidopsis thaliana	NP_568345.1
Arabidopsis thaliana	NP_001319903.1
Arabidopsis thaliana	NP_192883.2
Arabidopsis thaliana	NP_200456.1
Arabidopsis thaliana	NP_196509.1
Arabidopsis thaliana	NP_181526.1
Arabidopsis thaliana	NP_680566.5
Arabidopsis thaliana	NP_001321153.1
Arabidopsis thaliana	NP_001329297.1
Arabidopsis thaliana	NP_179836.1
Arabidopsis thaliana	NP_001322412.1
Arabidopsis thaliana	NP_564436.4
Arabidopsis thaliana	NP_180938.2
Arabidopsis thaliana	NP_178108.1
Arabidopsis thaliana	NP_001330533.1
Arabidopsis thaliana	NP_201302.1
Arabidopsis thaliana	NP_188659.1
Arabidopsis thaliana	NP_194188.1
Arabidopsis thaliana	NP_001190968.1
Arabidopsis thaliana	NP_001328265.1
Arabidopsis thaliana	NP_568060.1
Arabidopsis thaliana	NP_850451.1
Arabidopsis thaliana	NP_001331262.1
Arabidopsis thaliana	NP_001324476.1
Arabidopsis thaliana	NP_001330083.1
Arabidopsis thaliana	NP_568317.1
Arabidopsis thaliana	NP_001321871.1
Arabidopsis thaliana	NP_565048.1
Arabidopsis thaliana	NP_001331263.1
Arabidopsis thaliana	NP_567790.1
Arabidopsis thaliana	NP_565171.4
Arabidopsis thaliana	NP_197477.1
Arabidopsis thaliana	NP_001329298.1
Arabidopsis thaliana	NP_001329299.1
Arabidopsis thaliana	NP_974962.1
Arabidopsis thaliana	NP_197992.1
Arabidopsis thaliana	NP_199028.1
Arabidopsis thaliana	NP_180204.2
Arabidopsis thaliana	NP_001325776.1
Arabidopsis thaliana	NP_850252.1
Arabidopsis thaliana	NP_001327527.1
Arabidopsis thaliana	NP_001327528.1
Arabidopsis thaliana	NP_001321154.1
Arabidopsis thaliana	NP_190454.1
Arabidopsis thaliana	NP_196908.1
Arabidopsis thaliana	NP_001325191.1
Arabidopsis thaliana	NP_850452.1
Arabidopsis thaliana	NP_973698.1
Arabidopsis thaliana	NP_566251.1
Arabidopsis thaliana	NP_198104.1
Arabidopsis thaliana	NP_001324478.1
Arabidopsis thaliana	NP_179319.1
Arabidopsis thaliana	NP_001329296.1
Arabidopsis thaliana	NP_001329300.1
Arabidopsis thaliana	NP_001324477.1
Arabidopsis thaliana	NP_001325192.1
Arabidopsis thaliana	NP_567453.1
Arabidopsis thaliana	NP_974553.1
Arabidopsis thaliana	NP_974554.1
Arabidopsis thaliana	NP_563776.1
Blastocystis hominis	XP_012897155.1
Blastocystis hominis	XP_012898731.1
Blastocystis hominis	XP_012894686.1
Blastocystis hominis	XP_012895530.1
Blastocystis hominis	XP_012895634.1
Blastocystis hominis	XP_012898578.1
Blastocystis hominis	XP_012894077.1
Blastocystis hominis	XP_012898098.1
Blastocystis hominis	XP_012896310.1
Blastocystis hominis	XP_012895708.1
Blastocystis hominis	XP_012895083.1
Blastocystis hominis	XP_012898994.1
Blastocystis hominis	XP_012894805.1
Blastocystis hominis	XP_012899577.1
Blastocystis hominis	XP_012894530.1
Blastocystis hominis	XP_012899519.1
Blastocystis hominis	XP_012898996.1
Blastocystis hominis	XP_012896615.1
Blastocystis hominis	XP_012897575.1
Blastocystis hominis	XP_012899211.1
Blastocystis hominis	XP_012899002.1
Blastocystis hominis	XP_012896318.1
Blastocystis hominis	XP_012894367.1
Blastocystis hominis	XP_012897089.1
Blastocystis hominis	XP_012898547.1
Blastocystis hominis	XP_012894698.1
Blastocystis hominis	XP_012895730.1
Blastocystis hominis	XP_012898546.1
Blastocystis hominis	XP_012896079.1
Capsaspora owczarzaki	XP_004364767.1
Capsaspora owczarzaki	XP_004346961.1
Capsaspora owczarzaki	XP_004348149.1
Capsaspora owczarzaki	XP_004365395.2
Capsaspora owczarzaki	XP_004364270.1
Capsaspora owczarzaki	XP_004349707.2
Capsaspora owczarzaki	XP_004343599.2
Capsaspora owczarzaki	XP_004363720.1
Capsaspora owczarzaki	XP_004349695.1
Capsaspora owczarzaki	XP_004343837.1
Capsaspora owczarzaki	XP_004342874.2
Capsaspora owczarzaki	XP_004345739.1
Capsaspora owczarzaki	XP_004345099.2
Capsaspora owczarzaki	XP_004346098.1
Capsaspora owczarzaki	XP_004365008.1
Capsaspora owczarzaki	XP_011270049.1
Capsaspora owczarzaki	XP_004363387.1
Capsaspora owczarzaki	XP_004365322.2
Capsaspora owczarzaki	XP_004342772.1
Capsaspora owczarzaki	XP_004365006.1
Capsaspora owczarzaki	XP_004363337.2
Capsaspora owczarzaki	XP_004343378.2
Capsaspora owczarzaki	XP_004343393.1
Capsaspora owczarzaki	XP_004365955.2
Capsaspora owczarzaki	XP_004364651.2
Capsaspora owczarzaki	XP_004349848.2
Capsaspora owczarzaki	XP_004342638.1
Capsaspora owczarzaki	XP_004348067.1
Capsaspora owczarzaki	XP_004363712.2
Capsaspora owczarzaki	XP_004346661.1
Capsaspora owczarzaki	XP_004346210.1
Capsaspora owczarzaki	XP_004365057.2
Capsaspora owczarzaki	XP_004365572.1
Capsaspora owczarzaki	XP_004364196.1
Capsaspora owczarzaki	XP_004344251.1
Capsaspora owczarzaki	XP_011270317.1
Capsaspora owczarzaki	XP_004347884.2
Capsaspora owczarzaki	XP_004365931.2
Capsaspora owczarzaki	XP_011270732.1
Capsaspora owczarzaki	XP_011270900.1
Capsaspora owczarzaki	XP_004345343.1
Capsaspora owczarzaki	XP_004349503.1
Capsaspora owczarzaki	XP_004364777.1
Chlamydomonas reinhardtii	XP_001696228.1
Chlamydomonas reinhardtii	XP_001693350.1
Chlamydomonas reinhardtii	XP_001699329.1
Chlamydomonas reinhardtii	XP_001695177.1
Chlamydomonas reinhardtii	XP_001690376.1
Chlamydomonas reinhardtii	XP_001699426.1
Chlamydomonas reinhardtii	XP_001696593.1
Chlamydomonas reinhardtii	XP_001701258.1
Chlamydomonas reinhardtii	XP_001695417.1
Chlamydomonas reinhardtii	XP_001698250.1
Chlamydomonas reinhardtii	XP_001692254.1
Chlamydomonas reinhardtii	XP_001703031.1
Chlamydomonas reinhardtii	XP_001692197.1
Chlamydomonas reinhardtii	XP_001692288.1
Chlamydomonas reinhardtii	XP_001696360.1
Chlamydomonas reinhardtii	XP_001703074.1
Chlamydomonas reinhardtii	XP_001695134.1
Chlamydomonas reinhardtii	XP_001703576.1
Chlamydomonas reinhardtii	XP_001695360.1
Chlamydomonas reinhardtii	XP_001691328.1
Chlamydomonas reinhardtii	XP_001698491.1
Chlamydomonas reinhardtii	XP_001698926.1
Chlamydomonas reinhardtii	XP_001695808.1
Chlamydomonas reinhardtii	XP_001690577.1
Chlamydomonas reinhardtii	XP_001694819.1
Chlamydomonas reinhardtii	XP_001701998.1
Chlamydomonas reinhardtii	XP_001701982.1
Chlamydomonas reinhardtii	XP_001694108.1
Chlamydomonas reinhardtii	XP_001696251.1
Chlamydomonas reinhardtii	XP_001694598.1
Chlamydomonas reinhardtii	XP_001695358.1
Chlamydomonas reinhardtii	XP_001694499.1
Chlamydomonas reinhardtii	XP_001703470.1
Chlamydomonas reinhardtii	XP_001700954.1
Chlamydomonas reinhardtii	XP_001703471.1
Chlamydomonas reinhardtii	XP_001691371.1
Chlamydomonas reinhardtii	XP_001701973.1
Chlamydomonas reinhardtii	XP_001691961.1
Chlamydomonas reinhardtii	XP_001692622.1
Chlamydomonas reinhardtii	XP_001690711.1
Chlamydomonas reinhardtii	XP_001692399.1
Chlamydomonas reinhardtii	XP_001701425.1
Chlamydomonas reinhardtii	XP_001697915.1
Chlamydomonas reinhardtii	XP_001700310.1
Chondrus crispus	XP_005717087.1
Chondrus crispus	XP_005713745.1
Chondrus crispus	XP_005712928.1
Chondrus crispus	XP_005716252.1
Chondrus crispus	XP_005711091.1
Chondrus crispus	XP_005718170.1
Chondrus crispus	XP_005710664.1
Chondrus crispus	XP_005713349.1
Chondrus crispus	XP_005713945.1
Chondrus crispus	XP_005711116.1
Chondrus crispus	XP_005716513.1
Chondrus crispus	XP_005712673.1
Chondrus crispus	XP_005713228.1
Chondrus crispus	XP_005715711.1
Chondrus crispus	XP_005714818.1
Chondrus crispus	XP_005712486.1
Chondrus crispus	XP_005713316.1
Chondrus crispus	XP_005718550.1
Chondrus crispus	XP_005717380.1
Chondrus crispus	XP_005714940.1
Chondrus crispus	XP_005710058.1
Chondrus crispus	XP_005714042.1
Chondrus crispus	XP_005718261.1
Chondrus crispus	XP_005714309.1
Chondrus crispus	XP_005718984.1
Chondrus crispus	XP_005714310.1
Chondrus crispus	XP_005717287.1
Chrysochromulina tobinii	KOO53280.1
Chrysochromulina tobinii	KOO28243.1
Chrysochromulina tobinii	KOO28328.1
Chrysochromulina tobinii	KOO43560.1
Chrysochromulina tobinii	KOO22276.1
Chrysochromulina tobinii	KOO32956.1
Chrysochromulina tobinii	KOO28018.1
Chrysochromulina tobinii	KOO26371.1
Chrysochromulina tobinii	KOO30724.1
Chrysochromulina tobinii	KOO23161.1
Chrysochromulina tobinii	KOO21133.1
Chrysochromulina tobinii	KOO27891.1
Chrysochromulina tobinii	KOO25505.1
Chrysochromulina tobinii	KOO53657.1
Chrysochromulina tobinii	KOO32914.1
Chrysochromulina tobinii	KOO22165.1
Chrysochromulina tobinii	KOO29112.1
Chrysochromulina tobinii	KOO28272.1
Chrysochromulina tobinii	KOO33688.1
Chrysochromulina tobinii	KOO22901.1
Chrysochromulina tobinii	KOO35054.1
Chrysochromulina tobinii	KOO21575.1
Chrysochromulina tobinii	KOO30486.1
Chrysochromulina tobinii	KOO22801.1
Chrysochromulina tobinii	KOO24028.1
Chrysochromulina tobinii	KOO24805.1
Chrysochromulina tobinii	KOO30305.1
Chrysochromulina tobinii	KOO24066.1
Chrysochromulina tobinii	KOO24453.1
Chrysochromulina tobinii	KOO34288.1
Chrysochromulina tobinii	KOO35218.1
Chrysochromulina tobinii	KOO25640.1
Chrysochromulina tobinii	KOO21497.1
Chrysochromulina tobinii	KOO21103.1
Chrysochromulina tobinii	KOO22343.1
Chrysochromulina tobinii	KOO35878.1
Chrysochromulina tobinii	KOO29840.1
Chrysochromulina tobinii	KOO34980.1
Chrysochromulina tobinii	KOO28213.1
Chrysochromulina tobinii	KOO31642.1
Chrysochromulina tobinii	KOO28024.1
Chrysochromulina tobinii	KOO31768.1
Chrysochromulina tobinii	KOO21751.1
Chrysochromulina tobinii	KOO27845.1
Chrysochromulina tobinii	KOO21232.1
Chrysochromulina tobinii	KOO29772.1
Chrysochromulina tobinii	KOO22172.1
Chrysochromulina tobinii	KOO35766.1
Chrysochromulina tobinii	KOO26726.1
Chrysochromulina tobinii	KOO33461.1
Chrysochromulina tobinii	KOO32382.1
Chrysochromulina tobinii	KOO23433.1
Chrysochromulina tobinii	KOO53395.1
Chrysochromulina tobinii	KOO53798.1
Chrysochromulina tobinii	KOO52867.1
Chrysochromulina tobinii	KOO22659.1
Chrysochromulina tobinii	KOO21504.1
Chrysochromulina tobinii	KOO21164.1
Chrysochromulina tobinii	KOO25058.1
Cryptosporidium parvum	XP_627028.1
Cryptosporidium parvum	XP_001388196.1
Cryptosporidium parvum	XP_628066.1
Cryptosporidium parvum	XP_001388142.1
Cryptosporidium parvum	XP_627725.1
Cryptosporidium parvum	XP_626289.1
Cryptosporidium parvum	XP_627592.1
Cryptosporidium parvum	XP_001388047.1
Cryptosporidium parvum	XP_627593.1
Cyanidioschyzon merolae	XP_005538766.1
Cyanidioschyzon merolae	XP_005537244.1
Cyanidioschyzon merolae	XP_005535379.1
Cyanidioschyzon merolae	XP_005537669.1
Cyanidioschyzon merolae	XP_005537102.1
Cyanidioschyzon merolae	XP_005536315.1
Cyanidioschyzon merolae	XP_005536571.1
Cyanidioschyzon merolae	XP_005537111.1
Cyanidioschyzon merolae	XP_005538556.1
Cyanidioschyzon merolae	XP_005536054.1
Cyanidioschyzon merolae	XP_005539535.1
Cyanidioschyzon merolae	XP_005535016.1
Cyanidioschyzon merolae	XP_005537186.1
Cyanidioschyzon merolae	XP_005535367.1
Cyanidioschyzon merolae	XP_005539077.1
Cyanidioschyzon merolae	XP_005538381.1
Cyanidioschyzon merolae	XP_005534947.1
Cyanidioschyzon merolae	XP_005537059.1
Cyanidioschyzon merolae	XP_005535878.1
Cyanidioschyzon merolae	XP_005538448.1
Cyanidioschyzon merolae	XP_005539042.1
Cyanidioschyzon merolae	XP_005539349.1
Cyanidioschyzon merolae	XP_005539218.1
Cyanidioschyzon merolae	XP_005537756.1
Cyanidioschyzon merolae	XP_005536123.1
Cyanidioschyzon merolae	XP_005538974.1
Cyanidioschyzon merolae	XP_005538180.1
Cyanidioschyzon merolae	XP_005537771.1
Cyanidioschyzon merolae	XP_005539494.1
Cyanidioschyzon merolae	XP_005537722.1
Cyanidioschyzon merolae	XP_005538300.1
Danio rerio	NP_001013354.1
Danio rerio	XP_005160737.1
Danio rerio	NP_001153492.1
Danio rerio	XP_009299820.1
Danio rerio	NP_998422.1
Danio rerio	XP_005171964.1
Danio rerio	NP_997947.1
Danio rerio	XP_009299818.1
Danio rerio	NP_957153.1
Danio rerio	NP_001004606.1
Danio rerio	NP_956550.1
Danio rerio	XP_021326578.1
Danio rerio	XP_021333131.1
Danio rerio	XP_690428.1
Danio rerio	XP_005160240.1
Danio rerio	XP_021333128.1
Danio rerio	XP_021333126.1
Danio rerio	NP_001038417.1
Danio rerio	NP_991112.1
Danio rerio	XP_009305500.1
Danio rerio	NP_001038918.1
Danio rerio	XP_009297217.1
Danio rerio	XP_021323856.1
Danio rerio	XP_002662242.1
Danio rerio	XP_021332364.1
Danio rerio	NP_001002667.1
Danio rerio	NP_001002360.1
Danio rerio	XP_005158327.1
Danio rerio	NP_001122204.1
Danio rerio	NP_956458.1
Danio rerio	NP_571251.1
Danio rerio	NP_775354.1
Danio rerio	XP_017208245.1
Danio rerio	NP_001083023.1
Danio rerio	XP_005163988.1
Danio rerio	XP_005163987.1
Danio rerio	NP_001003448.1
Danio rerio	XP_005163986.1
Danio rerio	XP_686599.4
Danio rerio	NP_956647.2
Danio rerio	XP_021325481.1
Danio rerio	NP_998573.1
Danio rerio	XP_005172162.1
Danio rerio	XP_017211950.1
Danio rerio	NP_956780.1
Danio rerio	XP_001922072.1
Danio rerio	NP_999867.1
Danio rerio	XP_001920218.1
Danio rerio	NP_001083050.1
Danio rerio	NP_991278.1
Danio rerio	NP_956635.1
Danio rerio	NP_998322.1
Danio rerio	NP_001025408.1
Danio rerio	XP_001923807.2
Danio rerio	XP_005174420.1
Danio rerio	XP_009296229.1
Danio rerio	XP_021326336.1
Danio rerio	XP_021326337.1
Danio rerio	NP_001035060.1
Danio rerio	XP_005165234.1
Danio rerio	XP_002665132.2
Danio rerio	NP_001121816.1
Danio rerio	NP_001070100.1
Danio rerio	XP_009301224.1
Danio rerio	NP_001002367.1
Danio rerio	NP_955817.1
Danio rerio	NP_001002099.1
Danio rerio	NP_998284.2
Danio rerio	NP_001038779.1
Danio rerio	XP_021324193.1
Danio rerio	NP_001313457.1
Danio rerio	NP_001070070.1
Danio rerio	NP_001074107.1
Danio rerio	NP_956901.1
Danio rerio	NP_001004497.2
Danio rerio	XP_021332599.1
Danio rerio	NP_001189387.1
Danio rerio	NP_957466.1
Danio rerio	XP_001922909.3
Danio rerio	XP_009303837.1
Danio rerio	XP_017210347.1
Danio rerio	XP_021335557.1
Danio rerio	XP_002661286.1
Danio rerio	XP_021336675.1
Danio rerio	NP_001092731.2
Danio rerio	NP_001092917.1
Danio rerio	NP_001013537.1
Danio rerio	NP_001025314.1
Danio rerio	NP_001007351.1
Danio rerio	XP_021334024.1
Danio rerio	XP_005165550.1
Danio rerio	NP_956874.1
Danio rerio	XP_009300301.1
Danio rerio	XP_005170711.1
Danio rerio	NP_998887.1
Danio rerio	NP_001003884.1
Danio rerio	NP_001315501.1
Danio rerio	NP_957009.1
Danio rerio	XP_005164785.1
Danio rerio	XP_021325587.1
Danio rerio	XP_021325620.1
Danio rerio	XP_009289298.1
Danio rerio	XP_021324194.1
Danio rerio	XP_017208016.2
Danio rerio	XP_009296984.1
Danio rerio	XP_009296985.1
Danio rerio	XP_021335564.1
Danio rerio	XP_009305962.1
Danio rerio	XP_005172166.1
Danio rerio	XP_009300943.1
Danio rerio	NP_957049.1
Danio rerio	XP_021330409.1
Danio rerio	XP_009292374.1
Danio rerio	NP_571457.1
Danio rerio	XP_021333068.1
Danio rerio	XP_021336852.1
Danio rerio	NP_001002558.1
Dictyostelium discoideum	XP_642825.1
Dictyostelium discoideum	XP_638149.1
Dictyostelium discoideum	XP_635476.1
Dictyostelium discoideum	XP_639128.1
Dictyostelium discoideum	XP_629006.1
Dictyostelium discoideum	XP_645936.1
Dictyostelium discoideum	XP_629781.1
Dictyostelium discoideum	XP_635668.1
Dictyostelium discoideum	XP_001733006.1
Dictyostelium discoideum	XP_643363.1
Dictyostelium discoideum	XP_645896.1
Dictyostelium discoideum	XP_643352.1
Dictyostelium discoideum	XP_635136.1
Dictyostelium discoideum	XP_645993.1
Dictyostelium discoideum	XP_642050.1
Dictyostelium discoideum	XP_001733022.1
Dictyostelium discoideum	XP_647166.1
Dictyostelium discoideum	XP_638658.1
Dictyostelium discoideum	XP_641231.1
Dictyostelium discoideum	XP_644114.1
Dictyostelium discoideum	XP_645658.1
Dictyostelium discoideum	XP_647242.1
Dictyostelium discoideum	XP_638991.1
Dictyostelium discoideum	XP_641439.1
Dictyostelium discoideum	XP_640229.1
Dictyostelium discoideum	XP_641278.1
Dictyostelium discoideum	XP_645160.1
Dictyostelium discoideum	XP_638883.1
Dictyostelium discoideum	XP_645399.1
Dictyostelium discoideum	XP_628921.1
Dictyostelium discoideum	XP_629073.2
Dictyostelium discoideum	XP_002649113.1
Dictyostelium discoideum	XP_647235.1
Dictyostelium discoideum	XP_635187.1
Dictyostelium discoideum	XP_644393.1
Dictyostelium discoideum	XP_645020.1
Dictyostelium discoideum	XP_638161.1
Dictyostelium discoideum	XP_636240.1
Dictyostelium discoideum	XP_637489.1
Drosophila melanogaster	NP_001261760.1
Drosophila melanogaster	NP_729803.1
Drosophila melanogaster	NP_733366.2
Drosophila melanogaster	NP_651795.2
Drosophila melanogaster	NP_733365.1
Drosophila melanogaster	NP_001263107.1
Drosophila melanogaster	NP_733364.1
Drosophila melanogaster	NP_001247368.1
Drosophila melanogaster	NP_729802.1
Drosophila melanogaster	NP_996067.1
Drosophila melanogaster	NP_724769.2
Drosophila melanogaster	NP_477221.1
Drosophila melanogaster	NP_995616.1
Drosophila melanogaster	NP_609093.1
Drosophila melanogaster	NP_648501.1
Drosophila melanogaster	NP_729738.1
Drosophila melanogaster	NP_001245840.1
Drosophila melanogaster	NP_608615.1
Drosophila melanogaster	NP_001259432.1
Drosophila melanogaster	NP_511110.1
Drosophila melanogaster	NP_788898.1
Drosophila melanogaster	NP_609380.1
Drosophila melanogaster	NP_723564.1
Drosophila melanogaster	NP_001260325.1
Drosophila melanogaster	NP_723565.1
Drosophila melanogaster	NP_001285090.1
Drosophila melanogaster	NP_511109.1
Drosophila melanogaster	NP_727450.1
Drosophila melanogaster	NP_001287430.1
Drosophila melanogaster	NP_650891.1
Drosophila melanogaster	NP_996244.1
Drosophila melanogaster	NP_727448.1
Drosophila melanogaster	NP_727449.1
Drosophila melanogaster	NP_001287428.1
Drosophila melanogaster	NP_650034.1
Drosophila melanogaster	NP_731527.1
Drosophila melanogaster	NP_001287429.1
Drosophila melanogaster	NP_732519.3
Drosophila melanogaster	NP_001262490.1
Drosophila melanogaster	NP_650134.1
Drosophila melanogaster	NP_001287212.1
Drosophila melanogaster	NP_649731.1
Drosophila melanogaster	NP_610468.1
Drosophila melanogaster	NP_001027175.1
Drosophila melanogaster	NP_001027176.1
Drosophila melanogaster	NP_001027177.1
Drosophila melanogaster	NP_001027178.1
Drosophila melanogaster	NP_001027071.1
Drosophila melanogaster	NP_001027072.1
Drosophila melanogaster	NP_001027073.1
Drosophila melanogaster	NP_001285448.1
Drosophila melanogaster	NP_608327.2
Drosophila melanogaster	NP_651600.1
Drosophila melanogaster	NP_001259423.1
Drosophila melanogaster	NP_001188664.1
Drosophila melanogaster	NP_573246.1
Drosophila melanogaster	NP_572639.2
Drosophila melanogaster	NP_001246511.1
Drosophila melanogaster	NP_731657.2
Drosophila melanogaster	NP_647924.2
Drosophila melanogaster	NP_651703.1
Drosophila melanogaster	NP_647923.1
Drosophila melanogaster	NP_569856.2
Drosophila melanogaster	NP_608977.1
Drosophila melanogaster	NP_608976.1
Drosophila melanogaster	NP_001245841.1
Drosophila melanogaster	NP_001285773.1
Drosophila melanogaster	NP_609270.1
Drosophila melanogaster	NP_001260966.1
Drosophila melanogaster	NP_610934.1
Drosophila melanogaster	NP_001246615.1
Drosophila melanogaster	NP_728982.1
Drosophila melanogaster	NP_651415.1
Drosophila melanogaster	NP_651568.1
Drosophila melanogaster	NP_610933.1
Drosophila melanogaster	NP_610344.2
Drosophila melanogaster	NP_725361.1
Drosophila melanogaster	NP_001262021.1
Drosophila melanogaster	NP_649054.1
Drosophila melanogaster	NP_001287313.1
Drosophila melanogaster	NP_650279.1
Drosophila melanogaster	NP_731793.1
Drosophila melanogaster	NP_001287513.1
Drosophila melanogaster	NP_651284.1
Drosophila melanogaster	NP_001246757.1
Drosophila melanogaster	NP_524069.2
Drosophila melanogaster	NP_729978.1
Drosophila melanogaster	NP_732513.1
Drosophila melanogaster	NP_001286628.1
Drosophila melanogaster	NP_001286629.1
Drosophila melanogaster	NP_611468.1
Drosophila melanogaster	NP_001284759.1
Drosophila melanogaster	NP_001285447.1
Drosophila melanogaster	NP_728278.2
Drosophila melanogaster	NP_001188893.1
Drosophila melanogaster	NP_650135.2
Drosophila melanogaster	NP_001369058.1
Drosophila melanogaster	NP_001245904.1
Drosophila melanogaster	NP_723135.1
Drosophila melanogaster	NP_610935.1
Drosophila melanogaster	NP_651766.1
Drosophila melanogaster	NP_733341.1
Drosophila melanogaster	NP_649053.2
Drosophila melanogaster	NP_001262020.1
Drosophila melanogaster	NP_001286179.1
Drosophila melanogaster	NP_649873.1
Drosophila melanogaster	NP_573096.1
Drosophila melanogaster	NP_001246525.1
Drosophila melanogaster	NP_001246526.1
Drosophila melanogaster	NP_001246527.1
Drosophila melanogaster	NP_523869.1
Drosophila melanogaster	NP_728481.1
Drosophila melanogaster	NP_728482.1
Drosophila melanogaster	NP_609864.1
Drosophila melanogaster	NP_572408.2
Drosophila melanogaster	NP_001285392.1
Emiliania huxleyi	XP_005793477.1
Emiliania huxleyi	XP_005758690.1
Emiliania huxleyi	XP_005792150.1
Emiliania huxleyi	XP_005761109.1
Emiliania huxleyi	XP_005765354.1
Emiliania huxleyi	XP_005787421.1
Emiliania huxleyi	XP_005793476.1
Emiliania huxleyi	XP_005790660.1
Emiliania huxleyi	XP_005766327.1
Emiliania huxleyi	XP_005761172.1
Emiliania huxleyi	XP_005780815.1
Emiliania huxleyi	XP_005790920.1
Emiliania huxleyi	XP_005767200.1
Emiliania huxleyi	XP_005779024.1
Emiliania huxleyi	XP_005773144.1
Emiliania huxleyi	XP_005773430.1
Emiliania huxleyi	XP_005776167.1
Emiliania huxleyi	XP_005775230.1
Emiliania huxleyi	XP_005766926.1
Emiliania huxleyi	XP_005781712.1
Emiliania huxleyi	XP_005772431.1
Emiliania huxleyi	XP_005786159.1
Emiliania huxleyi	XP_005770317.1
Emiliania huxleyi	XP_005781024.1
Emiliania huxleyi	XP_005769902.1
Emiliania huxleyi	XP_005770030.1
Emiliania huxleyi	XP_005772104.1
Emiliania huxleyi	XP_005770904.1
Emiliania huxleyi	XP_005785532.1
Emiliania huxleyi	XP_005790714.1
Emiliania huxleyi	XP_005770118.1
Emiliania huxleyi	XP_005779658.1
Emiliania huxleyi	XP_005767373.1
Emiliania huxleyi	XP_005758397.1
Emiliania huxleyi	XP_005764697.1
Emiliania huxleyi	XP_005787361.1
Emiliania huxleyi	XP_005765873.1
Emiliania huxleyi	XP_005780371.1
Emiliania huxleyi	XP_005777076.1
Emiliania huxleyi	XP_005788791.1
Emiliania huxleyi	XP_005789357.1
Emiliania huxleyi	XP_005793987.1
Emiliania huxleyi	XP_005784607.1
Emiliania huxleyi	XP_005758338.1
Emiliania huxleyi	XP_005771141.1
Emiliania huxleyi	XP_005785847.1
Emiliania huxleyi	XP_005763391.1
Emiliania huxleyi	XP_005790174.1
Emiliania huxleyi	XP_005781014.1
Emiliania huxleyi	XP_005756063.1
Emiliania huxleyi	XP_005764851.1
Emiliania huxleyi	XP_005778650.1
Emiliania huxleyi	XP_005769241.1
Emiliania huxleyi	XP_005777945.1
Emiliania huxleyi	XP_005761176.1
Emiliania huxleyi	XP_005782917.1
Emiliania huxleyi	XP_005783149.1
Emiliania huxleyi	XP_005757700.1
Emiliania huxleyi	XP_005765030.1
Emiliania huxleyi	XP_005764878.1
Emiliania huxleyi	XP_005759607.1
Emiliania huxleyi	XP_005756365.1
Emiliania huxleyi	XP_005768333.1
Emiliania huxleyi	XP_005759174.1
Emiliania huxleyi	XP_005779767.1
Emiliania huxleyi	XP_005775564.1
Emiliania huxleyi	XP_005784231.1
Emiliania huxleyi	XP_005770329.1
Emiliania huxleyi	XP_005787808.1
Emiliania huxleyi	XP_005768856.1
Emiliania huxleyi	XP_005793565.1
Emiliania huxleyi	XP_005775176.1
Emiliania huxleyi	XP_005766136.1
Emiliania huxleyi	XP_005774660.1
Emiliania huxleyi	XP_005791612.1
Emiliania huxleyi	XP_005784766.1
Emiliania huxleyi	XP_005768213.1
Emiliania huxleyi	XP_005769206.1
Emiliania huxleyi	XP_005777224.1
Emiliania huxleyi	XP_005785508.1
Emiliania huxleyi	XP_005794305.1
Emiliania huxleyi	XP_005779401.1
Emiliania huxleyi	XP_005766427.1
Emiliania huxleyi	XP_005792001.1
Emiliania huxleyi	XP_005792784.1
Emiliania huxleyi	XP_005764119.1
Emiliania huxleyi	XP_005769215.1
Emiliania huxleyi	XP_005765013.1
Emiliania huxleyi	XP_005776958.1
Emiliania huxleyi	XP_005792383.1
Emiliania huxleyi	XP_005769400.1
Emiliania huxleyi	XP_005774913.1
Emiliania huxleyi	XP_005778224.1
Emiliania huxleyi	XP_005780144.1
Emiliania huxleyi	XP_005793819.1
Emiliania huxleyi	XP_005764552.1
Emiliania huxleyi	XP_005772952.1
Emiliania huxleyi	XP_005756456.1
Emiliania huxleyi	XP_005762204.1
Emiliania huxleyi	XP_005791649.1
Emiliania huxleyi	XP_005764780.1
Emiliania huxleyi	XP_005786619.1
Emiliania huxleyi	XP_005769668.1
Emiliania huxleyi	XP_005790286.1
Emiliania huxleyi	XP_005772240.1
Emiliania huxleyi	XP_005781846.1
Emiliania huxleyi	XP_005775198.1
Emiliania huxleyi	XP_005776140.1
Emiliania huxleyi	XP_005793189.1
Emiliania huxleyi	XP_005774693.1
Emiliania huxleyi	XP_005775783.1
Emiliania huxleyi	XP_005794409.1
Emiliania huxleyi	XP_005793358.1
Emiliania huxleyi	XP_005780300.1
Emiliania huxleyi	XP_005772289.1
Emiliania huxleyi	XP_005771174.1
Emiliania huxleyi	XP_005767650.1
Emiliania huxleyi	XP_005789287.1
Emiliania huxleyi	XP_005780018.1
Emiliania huxleyi	XP_005793184.1
Emiliania huxleyi	XP_005793492.1
Emiliania huxleyi	XP_005784530.1
Emiliania huxleyi	XP_005763757.1
Emiliania huxleyi	XP_005775866.1
Emiliania huxleyi	XP_005787054.1
Emiliania huxleyi	XP_005781434.1
Emiliania huxleyi	XP_005793493.1
Emiliania huxleyi	XP_005763516.1
Emiliania huxleyi	XP_005756210.1
Emiliania huxleyi	XP_005792563.1
Emiliania huxleyi	XP_005763698.1
Emiliania huxleyi	XP_005778211.1
Emiliania huxleyi	XP_005793028.1
Emiliania huxleyi	XP_005773557.1
Emiliania huxleyi	XP_005780701.1
Emiliania huxleyi	XP_005762141.1
Emiliania huxleyi	XP_005771749.1
Emiliania huxleyi	XP_005793196.1
Emiliania huxleyi	XP_005757308.1
Emiliania huxleyi	XP_005785831.1
Emiliania huxleyi	XP_005762318.1
Emiliania huxleyi	XP_005763277.1
Emiliania huxleyi	XP_005768202.1
Emiliania huxleyi	XP_005791580.1
Emiliania huxleyi	XP_005786473.1
Emiliania huxleyi	XP_005773432.1
Emiliania huxleyi	XP_005772814.1
Emiliania huxleyi	XP_005784122.1
Emiliania huxleyi	XP_005780032.1
Emiliania huxleyi	XP_005761332.1
Emiliania huxleyi	XP_005761245.1
Emiliania huxleyi	XP_005792881.1
Emiliania huxleyi	XP_005765818.1
Emiliania huxleyi	XP_005759651.1
Emiliania huxleyi	XP_005779269.1
Emiliania huxleyi	XP_005779086.1
Emiliania huxleyi	XP_005793037.1
Emiliania huxleyi	XP_005793541.1
Emiliania huxleyi	XP_005783768.1
Emiliania huxleyi	XP_005793470.1
Emiliania huxleyi	XP_005781359.1
Emiliania huxleyi	XP_005766916.1
Emiliania huxleyi	XP_005784287.1
Emiliania huxleyi	XP_005766532.1
Emiliania huxleyi	XP_005773142.1
Emiliania huxleyi	XP_005762536.1
Emiliania huxleyi	XP_005779602.1
Emiliania huxleyi	XP_005788607.1
Emiliania huxleyi	XP_005787359.1
Emiliania huxleyi	XP_005785081.1
Emiliania huxleyi	XP_005792319.1
Emiliania huxleyi	XP_005792462.1
Emiliania huxleyi	XP_005784613.1
Emiliania huxleyi	XP_005773316.1
Emiliania huxleyi	XP_005781977.1
Fonticula alba	XP_009494162.1
Fonticula alba	XP_009493514.1
Fonticula alba	XP_009496938.1
Fonticula alba	XP_009492592.1
Fonticula alba	XP_009495747.1
Fonticula alba	XP_009496328.1
Fonticula alba	XP_009493761.1
Fonticula alba	XP_009493216.1
Fonticula alba	XP_009496438.1
Fonticula alba	XP_009495138.1
Fonticula alba	XP_009497233.1
Fonticula alba	XP_009492865.1
Fonticula alba	XP_009496989.1
Fonticula alba	XP_009496506.1
Fonticula alba	XP_009496887.1
Fonticula alba	XP_009494006.1
Fonticula alba	XP_009493768.1
Fonticula alba	XP_009495072.1
Fonticula alba	XP_009494389.1
Fonticula alba	XP_009498128.1
Fonticula alba	XP_009492519.1
Fonticula alba	XP_009496491.1
Fonticula alba	XP_009494278.1
Fonticula alba	XP_009493286.1
Fonticula alba	XP_009498130.1
Guillardia theta	XP_005830658.1
Guillardia theta	XP_005835819.1
Guillardia theta	XP_005833561.1
Guillardia theta	XP_005833577.1
Guillardia theta	XP_005829781.1
Guillardia theta	XP_005829948.1
Guillardia theta	XP_005841993.1
Guillardia theta	XP_005839006.1
Guillardia theta	XP_005828292.1
Guillardia theta	XP_005831526.1
Guillardia theta	XP_005827177.1
Guillardia theta	XP_005820179.1
Guillardia theta	XP_005821708.1
Guillardia theta	XP_005828108.1
Guillardia theta	XP_005837686.1
Guillardia theta	XP_005834295.1
Guillardia theta	XP_005837125.1
Guillardia theta	XP_005839378.1
Guillardia theta	XP_005826190.1
Guillardia theta	XP_005834811.1
Guillardia theta	XP_005841760.1
Guillardia theta	XP_005838273.1
Guillardia theta	XP_005825520.1
Guillardia theta	XP_005831035.1
Guillardia theta	XP_005838499.1
Guillardia theta	XP_005836913.1
Guillardia theta	XP_005829045.1
Guillardia theta	XP_005819008.1
Guillardia theta	XP_005824432.1
Guillardia theta	XP_005831789.1
Guillardia theta	XP_005820164.1
Guillardia theta	XP_005839984.1
Guillardia theta	XP_005821685.1
Guillardia theta	XP_005823766.1
Guillardia theta	XP_005825099.1
Guillardia theta	XP_005835585.1
Guillardia theta	XP_005828770.1
Guillardia theta	XP_005832732.1
Guillardia theta	XP_005825108.1
Guillardia theta	XP_005829782.1
Guillardia theta	XP_005826791.1
Guillardia theta	XP_005823247.1
Guillardia theta	XP_005823964.1
Guillardia theta	XP_005839976.1
Guillardia theta	XP_005836197.1
Guillardia theta	XP_005823981.1
Guillardia theta	XP_005830286.1
Guillardia theta	XP_005827175.1
Guillardia theta	XP_005833967.1
Guillardia theta	XP_005824565.1
Guillardia theta	XP_005819314.1
Guillardia theta	XP_005834074.1
Guillardia theta	XP_005832930.1
Guillardia theta	XP_005832410.1
Guillardia theta	XP_005840659.1
Guillardia theta	XP_005842015.1
Guillardia theta	XP_005835678.1
Guillardia theta	XP_005819070.1
Guillardia theta	XP_005838371.1
Guillardia theta	XP_005841284.1
Guillardia theta	XP_005832967.1
Guillardia theta	XP_005839047.1
Guillardia theta	XP_005820386.1
Guillardia theta	XP_005841081.1
Guillardia theta	XP_005829860.1
Guillardia theta	XP_005828321.1
Guillardia theta	XP_005836737.1
Guillardia theta	XP_005825799.1
Guillardia theta	XP_005820407.1
Guillardia theta	XP_005826523.1
Guillardia theta	XP_005836392.1
Guillardia theta	XP_005839198.1
Guillardia theta	XP_005824158.1
Guillardia theta	XP_005833151.1
Guillardia theta	XP_005835073.1
Guillardia theta	XP_005840304.1
Guillardia theta	XP_005827532.1
Guillardia theta	XP_005822546.1
Guillardia theta	XP_005819287.1
Guillardia theta	XP_005826466.1
Guillardia theta	XP_005822692.1
Guillardia theta	XP_005825686.1
Guillardia theta	XP_005829794.1
Guillardia theta	XP_005820105.1
Guillardia theta	XP_005840905.1
Guillardia theta	XP_005822550.1
Guillardia theta	XP_005819286.1
Guillardia theta	XP_005819680.1
Guillardia theta	XP_005839710.1
Guillardia theta	XP_005821190.1
Homo sapiens	NP_998816.1
Homo sapiens	NP_037518.3
Homo sapiens	XP_006717012.1
Homo sapiens	XP_016867153.1
Homo sapiens	XP_016867154.1
Homo sapiens	NP_443133.2
Homo sapiens	XP_006717011.1
Homo sapiens	NP_001006643.1
Homo sapiens	NP_001006642.1
Homo sapiens	NP_001252543.1
Homo sapiens	NP_001308473.1
Homo sapiens	NP_848621.2
Homo sapiens	XP_005259918.1
Homo sapiens	XP_011526239.1
Homo sapiens	NP_001317917.1
Homo sapiens	NP_112581.1
Homo sapiens	XP_016867152.1
Homo sapiens	XP_016882159.1
Homo sapiens	NP_055066.1
Homo sapiens	NP_001153682.1
Homo sapiens	XP_006715894.1
Homo sapiens	XP_011510372.1
Homo sapiens	NP_077008.2
Homo sapiens	NP_003696.2
Homo sapiens	NP_689920.1
Homo sapiens	XP_011526583.1
Homo sapiens	XP_011526580.1
Homo sapiens	XP_011526579.1
Homo sapiens	XP_016882774.1
Homo sapiens	XP_011526577.1
Homo sapiens	XP_011526576.1
Homo sapiens	NP_000378.1
Homo sapiens	NP_110407.2
Homo sapiens	NP_001142.2
Homo sapiens	NP_001627.2
Homo sapiens	NP_001010875.1
Homo sapiens	XP_016876013.1
Homo sapiens	NP_001098117.1
Homo sapiens	NP_001143.2
Homo sapiens	NP_001368872.1
Homo sapiens	NP_001368873.1
Homo sapiens	NP_001368874.1
Homo sapiens	NP_001368876.1
Homo sapiens	NP_001368877.1
Homo sapiens	NP_003346.2
Homo sapiens	NP_001119593.1
Homo sapiens	NP_001119594.1
Homo sapiens	NP_068380.3
Homo sapiens	XP_005257616.1
Homo sapiens	XP_005257617.1
Homo sapiens	XP_005257618.1
Homo sapiens	XP_005257619.1
Homo sapiens	XP_006722070.1
Homo sapiens	XP_016880415.1
Homo sapiens	NP_001269127.1
Homo sapiens	NP_001269125.1
Homo sapiens	NP_001269124.1
Homo sapiens	XP_011529704.1
Homo sapiens	NP_001034444.1
Homo sapiens	NP_004268.3
Homo sapiens	NP_060625.2
Homo sapiens	NP_872362.3
Homo sapiens	NP_003347.1
Homo sapiens	NP_115691.1
Homo sapiens	NP_001339310.2
Homo sapiens	XP_011526228.1
Homo sapiens	NP_775908.2
Homo sapiens	NP_057696.2
Homo sapiens	NP_001177989.1
Homo sapiens	NP_001177990.1
Homo sapiens	NP_078974.1
Homo sapiens	XP_011518671.1
Homo sapiens	XP_011518672.1
Homo sapiens	XP_011518673.1
Homo sapiens	XP_024304455.1
Homo sapiens	XP_024304456.1
Homo sapiens	XP_024304457.1
Homo sapiens	NP_061331.2
Homo sapiens	XP_024305247.1
Homo sapiens	NP_001339750.1
Homo sapiens	XP_006720101.1
Homo sapiens	NP_005975.1
Homo sapiens	NP_001308169.1
Homo sapiens	XP_006720102.1
Homo sapiens	NP_112489.3
Homo sapiens	NP_001290413.1
Homo sapiens	NP_113669.1
Homo sapiens	XP_011544453.1
Homo sapiens	XP_011544454.1
Homo sapiens	XP_011544455.1
Homo sapiens	XP_011544456.1
Homo sapiens	XP_016884457.1
Homo sapiens	XP_016885425.1
Homo sapiens	NP_085134.1
Homo sapiens	NP_001269126.1
Homo sapiens	NP_001164641.1
Homo sapiens	XP_011544452.1
Homo sapiens	XP_016885428.1
Homo sapiens	XP_016885427.1
Homo sapiens	XP_016885426.1
Homo sapiens	NP_055067.1
Homo sapiens	NP_660348.2
Homo sapiens	XP_005263263.1
Homo sapiens	XP_011544451.1
Homo sapiens	NP_057100.1
Homo sapiens	NP_068605.1
Homo sapiens	NP_001243463.1
Homo sapiens	NP_001336265.1
Homo sapiens	XP_006714609.1
Homo sapiens	XP_016864576.1
Homo sapiens	XP_016864577.1
Homo sapiens	NP_001137252.1
Homo sapiens	XP_024306565.1
Homo sapiens	NP_997000.2
Homo sapiens	XP_005249540.1
Homo sapiens	NP_003553.2
Homo sapiens	NP_001190980.1
Homo sapiens	XP_024309379.1
Homo sapiens	XP_011532171.1
Homo sapiens	XP_006713277.1
Homo sapiens	NP_114153.1
Homo sapiens	NP_060345.2
Homo sapiens	XP_011523184.1
Homo sapiens	NP_001311241.1
Homo sapiens	NP_001311242.1
Homo sapiens	NP_001308170.1
Homo sapiens	XP_011535589.1
Homo sapiens	XP_011523182.1
Homo sapiens	XP_024304442.1
Homo sapiens	XP_024306564.1
Homo sapiens	XP_011526584.1
Homo sapiens	NP_001273735.1
Homo sapiens	NP_001368878.1
Homo sapiens	XP_011526586.1
Homo sapiens	XP_016882777.1
Homo sapiens	XP_011526585.1
Homo sapiens	NP_001305396.1
Homo sapiens	XP_011526582.1
Homo sapiens	XP_011535590.1
Homo sapiens	NP_001158889.1
Homo sapiens	NP_036272.2
Homo sapiens	NP_006349.1
Homo sapiens	XP_024306762.1
Homo sapiens	NP_073714.1
Homo sapiens	XP_011540598.1
Homo sapiens	XP_011530530.1
Homo sapiens	XP_011542852.1
Homo sapiens	NP_001308227.1
Homo sapiens	NP_001287749.2
Homo sapiens	NP_001265179.3
Homo sapiens	XP_005263560.1
Homo sapiens	XP_005266379.1
Homo sapiens	XP_005266378.1
Homo sapiens	XP_006719856.1
Homo sapiens	XP_006719857.1
Homo sapiens	XP_016876012.1
Homo sapiens	NP_001304742.1
Homo sapiens	NP_001304743.1
Homo sapiens	XP_006716415.1
Homo sapiens	XP_011542855.1
Homo sapiens	XP_016869021.1
Homo sapiens	NP_001257817.1
Homo sapiens	NP_001265180.2
Homo sapiens	XP_016882779.1
Homo sapiens	XP_011538541.1
Homo sapiens	XP_006714613.1
Homo sapiens	XP_011526587.1
Homo sapiens	NP_001364315.1
Homo sapiens	NP_001364316.1
Homo sapiens	NP_001364317.1
Homo sapiens	NP_055470.1
Homo sapiens	XP_024306839.1
Homo sapiens	NP_001070709.3
Homo sapiens	NP_001339311.2
Homo sapiens	XP_016882775.1
Homo sapiens	XP_011526578.1
Homo sapiens	NP_001273113.1
Homo sapiens	NP_001364314.1
Homo sapiens	XP_011508482.1
Homo sapiens	XP_011508483.1
Homo sapiens	XP_005270265.1
Homo sapiens	XP_005270268.1
Homo sapiens	XP_006718068.1
Homo sapiens	XP_024303989.1
Homo sapiens	XP_024303990.1
Homo sapiens	XP_024303991.1
Homo sapiens	NP_001337920.1
Homo sapiens	NP_001366139.1
Homo sapiens	NP_775742.4
Homo sapiens	NP_997231.1
Homo sapiens	NP_001311243.1
Homo sapiens	NP_001311244.1
Homo sapiens	NP_002626.1
Homo sapiens	NP_998776.1
Homo sapiens	NP_001307799.1
Homo sapiens	NP_005879.1
Homo sapiens	NP_001273736.1
Homo sapiens	XP_011533329.1
Homo sapiens	XP_016880416.1
Homo sapiens	XP_011530600.1
Homo sapiens	XP_016884459.1
Homo sapiens	XP_016884460.1
Homo sapiens	XP_016884461.1
Homo sapiens	XP_016884462.1
Homo sapiens	XP_016884463.1
Homo sapiens	XP_016884464.1
Homo sapiens	XP_005262546.1
Homo sapiens	NP_001269655.1
Homo sapiens	XP_016879709.1
Homo sapiens	XP_006713019.1
Homo sapiens	NP_001336264.1
Homo sapiens	NP_001311246.1
Homo sapiens	XP_016884829.1
Homo sapiens	XP_016884830.1
Homo sapiens	NP_001190981.1
Homo sapiens	NP_001278742.1
Homo sapiens	NP_001278743.1
Homo sapiens	NP_001339749.1
Homo sapiens	NP_001339751.1
Homo sapiens	NP_001339752.1
Homo sapiens	NP_689546.1
Homo sapiens	XP_011534749.1
Homo sapiens	XP_011534750.1
Homo sapiens	NP_001368879.1
Homo sapiens	XP_011522148.1
Homo sapiens	XP_016882780.1
Homo sapiens	XP_016882778.1
Homo sapiens	XP_011535591.1
Homo sapiens	XP_016882776.1
Homo sapiens	XP_011526581.1
Homo sapiens	XP_016880417.1
Homo sapiens	NP_001341727.1
Homo sapiens	NP_001353655.1
Homo sapiens	XP_016885429.1
Homo sapiens	XP_016856572.1
Homo sapiens	NP_001339312.2
Homo sapiens	NP_001339313.2
Homo sapiens	NP_001274316.1
Homo sapiens	XP_005256698.1
Homo sapiens	NP_001307806.1
Homo sapiens	NP_001269656.1
Homo sapiens	NP_001158890.1
Homo sapiens	XP_011523185.1
Homo sapiens	XP_011523186.1
Homo sapiens	NP_001304741.1
Homo sapiens	XP_011542856.1
Homo sapiens	XP_005247632.1
Homo sapiens	XP_016885430.1
Homo sapiens	XP_016885431.1
Homo sapiens	XP_011541501.1
Homo sapiens	XP_005271960.1
Homo sapiens	XP_011541498.1
Homo sapiens	XP_016864578.1
Homo sapiens	XP_024308242.1
Homo sapiens	XP_006714607.1
Homo sapiens	XP_011539595.1
Homo sapiens	NP_001307800.1
Homo sapiens	NP_001307801.1
Homo sapiens	NP_958928.1
Homo sapiens	XP_011539594.1
Homo sapiens	NP_001158268.1
Homo sapiens	NP_001337921.1
Homo sapiens	NP_001337922.1
Homo sapiens	XP_011531629.1
Homo sapiens	XP_016882781.1
Homo sapiens	NP_001364318.1
Homo sapiens	NP_001364319.1
Homo sapiens	NP_001029344.4
Homo sapiens	NP_219480.1
Homo sapiens	XP_016885432.1
Homo sapiens	NP_001257882.1
Homo sapiens	XP_016861163.1
Homo sapiens	NP_001337806.1
Homo sapiens	XP_011533328.1
Homo sapiens	XP_011531630.1
Homo sapiens	NP_660325.4
Homo sapiens	XP_011514029.1
Homo sapiens	XP_006714615.1
Homo sapiens	XP_024309103.1
Homo sapiens	XP_016864580.1
Homo sapiens	NP_001012773.2
Homo sapiens	XP_005262186.1
Homo sapiens	XP_011529254.1
Homo sapiens	XP_011529255.1
Homo sapiens	XP_016885005.1
Homo sapiens	XP_024308148.1
Homo sapiens	XP_016885003.1
Homo sapiens	XP_016885004.1
Homo sapiens	XP_016880123.1
Homo sapiens	XP_024306516.1
Homo sapiens	XP_006718069.1
Homo sapiens	XP_011538546.1
Homo sapiens	NP_001290179.1
Homo sapiens	NP_001290178.1
Homo sapiens	NP_620128.1
Homo sapiens	XP_011518262.1
Homo sapiens	XP_011518261.1
Homo sapiens	NP_001304161.1
Homo sapiens	NP_055157.1
Homo sapiens	NP_001304160.1
Homo sapiens	XP_016872951.1
Homo sapiens	XP_006718235.1
Homo sapiens	XP_011518263.1
Homo sapiens	NP_055156.1
Homo sapiens	NP_001258570.1
Homo sapiens	XP_005249036.1
Homo sapiens	XP_005249035.1
Homo sapiens	NP_001336274.1
Homo sapiens	XP_016866132.1
Homo sapiens	XP_011512752.1
Homo sapiens	XP_016866131.1
Homo sapiens	NP_001304162.1
Kipferlia bialata	GCA64584.1
Leishmania major	XP_001686621.1
Leishmania major	XP_001682597.1
Leishmania major	XP_001682598.1
Leishmania major	XP_001682098.1
Leishmania major	XP_001683773.1
Leishmania major	XP_003722361.1
Leishmania major	XP_001682099.1
Leishmania major	XP_003722727.1
Leishmania major	XP_001682694.1
Leishmania major	XP_001685428.1
Leishmania major	XP_001685427.1
Leishmania major	XP_001686410.1
Leishmania major	XP_001684700.1
Leishmania major	XP_001681300.1
Leishmania major	XP_001681926.1
Leishmania major	XP_001687506.1
Leishmania major	XP_003722794.1
Leishmania major	XP_001685323.1
Leishmania major	XP_001683483.1
Leishmania major	XP_001687254.1
Leishmania major	XP_001682533.1
Leishmania major	XP_001682534.1
Leishmania major	XP_001682535.1
Leishmania major	XP_001682537.1
Leishmania major	XP_001682538.1
Leishmania major	XP_001682536.1
Leishmania major	XP_001682532.1
Leishmania major	XP_001682539.1
Leishmania major	XP_001680959.1
Leishmania major	XP_003722840.1
Leishmania major	XP_003722839.1
Leishmania major	XP_003721672.1
Leishmania major	XP_001687698.1
Leishmania major	XP_001681436.1
Leishmania major	XP_001687265.1
Leishmania major	XP_001682506.1
Leishmania major	XP_001684612.1
Leishmania major	XP_001684829.1
Leishmania major	XP_001683182.1
Leishmania major	XP_003722412.1
Leishmania major	XP_001687699.1
Micromonas commoda	XP_002508333.1
Micromonas commoda	XP_002503900.1
Micromonas commoda	XP_002500487.1
Micromonas commoda	XP_002503204.1
Micromonas commoda	XP_002500313.1
Micromonas commoda	XP_002502963.1
Micromonas commoda	XP_002509046.1
Micromonas commoda	XP_002501327.1
Micromonas commoda	XP_002500000.1
Micromonas commoda	XP_002503554.1
Micromonas commoda	XP_002506340.1
Micromonas commoda	XP_002502429.1
Micromonas commoda	XP_002502432.1
Micromonas commoda	XP_002500028.1
Micromonas commoda	XP_002499375.1
Micromonas commoda	XP_002501280.1
Micromonas commoda	XP_002503138.1
Micromonas commoda	XP_002503139.1
Micromonas commoda	XP_002502042.1
Micromonas commoda	XP_002506016.1
Micromonas commoda	XP_002504104.1
Micromonas commoda	XP_002503685.1
Micromonas commoda	XP_002502989.1
Micromonas commoda	XP_002505989.1
Micromonas commoda	XP_002505990.1
Micromonas commoda	XP_002506755.1
Micromonas commoda	XP_002505418.1
Micromonas commoda	XP_002501164.1
Micromonas commoda	XP_002505284.1
Micromonas commoda	XP_002509228.1
Micromonas commoda	XP_002504685.1
Micromonas commoda	XP_002507364.1
Micromonas commoda	XP_002505072.1
Micromonas commoda	XP_002501272.1
Micromonas commoda	XP_002501559.1
Micromonas commoda	XP_002509286.1
Micromonas commoda	XP_002503601.1
Micromonas commoda	XP_002507469.1
Micromonas commoda	XP_002501167.1
Micromonas commoda	XP_002502956.1
Micromonas commoda	XP_002500224.1
Micromonas commoda	XP_002508974.1
Micromonas commoda	XP_002502611.1
Micromonas commoda	XP_002502691.1
Micromonas commoda	XP_002509174.1
Micromonas commoda	XP_002507475.1
Micromonas commoda	XP_002509195.1
Monosiga brevicollis	XP_001747021.1
Monosiga brevicollis	XP_001746032.1
Monosiga brevicollis	XP_001743092.1
Monosiga brevicollis	XP_001749609.1
Monosiga brevicollis	XP_001749433.1
Monosiga brevicollis	XP_001746919.1
Monosiga brevicollis	XP_001747926.1
Monosiga brevicollis	XP_001745129.1
Monosiga brevicollis	XP_001743478.1
Monosiga brevicollis	XP_001745384.1
Monosiga brevicollis	XP_001744651.1
Monosiga brevicollis	XP_001749914.1
Monosiga brevicollis	XP_001750507.1
Monosiga brevicollis	XP_001743263.1
Monosiga brevicollis	XP_001749495.1
Monosiga brevicollis	XP_001747932.1
Monosiga brevicollis	XP_001743756.1
Monosiga brevicollis	XP_001750563.1
Monosiga brevicollis	XP_001745080.1
Monosiga brevicollis	XP_001749374.1
Monosiga brevicollis	XP_001743875.1
Monosiga brevicollis	XP_001746007.1
Monosiga brevicollis	XP_001743435.1
Monosiga brevicollis	XP_001746221.1
Monosiga brevicollis	XP_001747248.1
Monosiga brevicollis	XP_001745281.1
Monosiga brevicollis	XP_001744152.1
Monosiga brevicollis	XP_001745266.1
Monosiga brevicollis	XP_001746504.1
Monosiga brevicollis	XP_001745291.1
Monosiga brevicollis	XP_001745921.1
Monosiga brevicollis	XP_001745729.1
Monosiga brevicollis	XP_001746306.1
Monosiga brevicollis	XP_001749847.1
Monosiga brevicollis	XP_001747860.1
Monosiga brevicollis	XP_001750746.1
Monosiga brevicollis	XP_001748971.1
Monosiga brevicollis	XP_001745922.1
Naegleria gruberi	XP_002683284.1
Naegleria gruberi	XP_002682488.1
Naegleria gruberi	XP_002674890.1
Naegleria gruberi	XP_002679471.1
Naegleria gruberi	XP_002680141.1
Naegleria gruberi	XP_002682745.1
Naegleria gruberi	XP_002670442.1
Naegleria gruberi	XP_002678184.1
Naegleria gruberi	XP_002675853.1
Naegleria gruberi	XP_002668280.1
Naegleria gruberi	XP_002668652.1
Naegleria gruberi	XP_002675449.1
Naegleria gruberi	XP_002683047.1
Naegleria gruberi	XP_002679591.1
Naegleria gruberi	XP_002673897.1
Naegleria gruberi	XP_002683073.1
Naegleria gruberi	XP_002672900.1
Naegleria gruberi	XP_002670309.1
Naegleria gruberi	XP_002671475.1
Naegleria gruberi	XP_002679290.1
Naegleria gruberi	XP_002673648.1
Naegleria gruberi	XP_002674967.1
Naegleria gruberi	XP_002671468.1
Naegleria gruberi	XP_002672139.1
Naegleria gruberi	XP_002671583.1
Naegleria gruberi	XP_002678545.1
Naegleria gruberi	XP_002680344.1
Naegleria gruberi	XP_002672678.1
Naegleria gruberi	XP_002675703.1
Naegleria gruberi	XP_002682974.1
Naegleria gruberi	XP_002679048.1
Naegleria gruberi	XP_002681706.1
Naegleria gruberi	XP_002678747.1
Naegleria gruberi	XP_002678777.1
Naegleria gruberi	XP_002669219.1
Naegleria gruberi	XP_002677822.1
Naegleria gruberi	XP_002670414.1
Naegleria gruberi	XP_002671844.1
Naegleria gruberi	XP_002678224.1
Naegleria gruberi	XP_002681519.1
Naegleria gruberi	XP_002682805.1
Naegleria gruberi	XP_002681394.1
Naegleria gruberi	XP_002679604.1
Naegleria gruberi	XP_002670220.1
Naegleria gruberi	XP_002677380.1
Naegleria gruberi	XP_002682138.1
Naegleria gruberi	XP_002682156.1
Naegleria gruberi	XP_002668657.1
Naegleria gruberi	XP_002682509.1
Naegleria gruberi	XP_002674780.1
Naegleria gruberi	XP_002678546.1
Naegleria gruberi	XP_002668211.1
Naegleria gruberi	XP_002670352.1
Naegleria gruberi	XP_002680286.1
Naegleria gruberi	XP_002681300.1
Neurospora crassa	XP_956574.1
Neurospora crassa	XP_965547.1
Neurospora crassa	XP_961607.1
Neurospora crassa	XP_959605.1
Neurospora crassa	XP_011393638.1
Neurospora crassa	XP_962756.2
Neurospora crassa	XP_956201.2
Neurospora crassa	XP_958877.1
Neurospora crassa	XP_960396.3
Neurospora crassa	XP_960808.1
Neurospora crassa	XP_962539.2
Neurospora crassa	XP_964458.1
Neurospora crassa	XP_963772.1
Neurospora crassa	XP_961140.1
Neurospora crassa	XP_956963.2
Neurospora crassa	XP_961906.2
Neurospora crassa	XP_957787.1
Neurospora crassa	XP_959913.1
Neurospora crassa	XP_962117.1
Neurospora crassa	XP_962817.1
Neurospora crassa	XP_960909.1
Neurospora crassa	XP_956119.2
Neurospora crassa	XP_011395026.1
Neurospora crassa	XP_011395027.1
Neurospora crassa	XP_956064.3
Neurospora crassa	XP_011393639.1
Neurospora crassa	XP_011393175.1
Neurospora crassa	XP_011393176.1
Neurospora crassa	XP_965360.1
Neurospora crassa	XP_962443.1
Neurospora crassa	XP_963478.1
Neurospora crassa	XP_959773.1
Neurospora crassa	XP_958272.1
Neurospora crassa	XP_956205.1
Neurospora crassa	XP_956488.2
Neurospora crassa	XP_956124.1
Neurospora crassa	XP_011393485.1
Neurospora crassa	XP_011393486.1
Neurospora crassa	XP_011393046.1
Neurospora crassa	XP_011393045.1
Neurospora crassa	XP_959763.1
Neurospora crassa	XP_958084.1
Oryza sativa	NP_001056459.1
Oryza sativa	NP_001041995.1
Oryza sativa	NP_001055296.1
Oryza sativa	NP_001058018.1
Oryza sativa	NP_001054775.1
Oryza sativa	NP_001046230.1
Oryza sativa	NP_001049366.1
Oryza sativa	NP_001045309.1
Oryza sativa	NP_001049667.1
Oryza sativa	NP_001051182.1
Oryza sativa	NP_001042669.1
Oryza sativa	NP_001047941.1
Oryza sativa	NP_001055139.1
Oryza sativa	NP_001068559.2
Oryza sativa	NP_001049803.1
Oryza sativa	NP_001044030.2
Oryza sativa	NP_001065471.1
Oryza sativa	NP_001043375.1
Oryza sativa	NP_001049833.1
Oryza sativa	NP_001042456.1
Oryza sativa	NP_001047664.1
Oryza sativa	NP_001068409.1
Oryza sativa	NP_001063557.1
Oryza sativa	NP_001049647.1
Oryza sativa	NP_001062264.1
Oryza sativa	NP_001063413.1
Oryza sativa	NP_001059405.1
Oryza sativa	NP_001063624.1
Oryza sativa	NP_001049231.1
Oryza sativa	NP_001055312.1
Oryza sativa	NP_001051308.1
Oryza sativa	NP_001042922.1
Oryza sativa	NP_001063299.1
Oryza sativa	NP_001061710.1
Oryza sativa	NP_001067793.1
Oryza sativa	NP_001049133.2
Oryza sativa	NP_001054904.1
Oryza sativa	NP_001045491.1
Oryza sativa	NP_001064535.1
Oryza sativa	NP_001065524.1
Oryza sativa	NP_001065240.1
Oryza sativa	NP_001055452.1
Oryza sativa	NP_001048232.1
Oryza sativa	NP_001057115.1
Oryza sativa	NP_001052925.1
Oryza sativa	NP_001063353.1
Oryza sativa	NP_001052927.1
Oryza sativa	NP_001066927.1
Oryza sativa	NP_001058009.2
Oryza sativa	NP_001043181.2
Oryza sativa	NP_001049633.1
Oryza sativa	NP_001063885.2
Oryza sativa	NP_001042453.1
Oryza sativa	NP_001176505.1
Oryza sativa	NP_001172375.1
Oryza sativa	NP_001065472.2
Oryza sativa	NP_001045576.1
Oryza sativa	NP_001046338.2
Oryza sativa	NP_001174505.1
Oryza sativa	NP_001046345.2
Oryza sativa	NP_001062052.1
Oryza sativa	NP_001176517.1
Oryza sativa	NP_001053368.1
Paramecium tetraurelia	XP_001434420.1
Paramecium tetraurelia	XP_001430538.1
Paramecium tetraurelia	XP_001455739.1
Paramecium tetraurelia	XP_001456230.1
Paramecium tetraurelia	XP_001440379.1
Paramecium tetraurelia	XP_001453527.1
Paramecium tetraurelia	XP_001426646.1
Paramecium tetraurelia	XP_001426957.1
Paramecium tetraurelia	XP_001438694.1
Paramecium tetraurelia	XP_001439784.1
Paramecium tetraurelia	XP_001461714.1
Paramecium tetraurelia	XP_001456892.1
Paramecium tetraurelia	XP_001454526.1
Paramecium tetraurelia	XP_001435679.1
Paramecium tetraurelia	XP_001443276.1
Paramecium tetraurelia	XP_001429887.1
Paramecium tetraurelia	XP_001449906.1
Paramecium tetraurelia	XP_001443385.1
Paramecium tetraurelia	XP_001442640.1
Paramecium tetraurelia	XP_001426773.1
Paramecium tetraurelia	XP_001442856.1
Paramecium tetraurelia	XP_001442948.1
Paramecium tetraurelia	XP_001423077.1
Paramecium tetraurelia	XP_001432513.1
Paramecium tetraurelia	XP_001434971.1
Paramecium tetraurelia	XP_001430043.1
Paramecium tetraurelia	XP_001446017.1
Paramecium tetraurelia	XP_001449701.1
Paramecium tetraurelia	XP_001431858.1
Paramecium tetraurelia	XP_001447949.1
Paramecium tetraurelia	XP_001451122.1
Paramecium tetraurelia	XP_001434419.1
Paramecium tetraurelia	XP_001457474.1
Paramecium tetraurelia	XP_001452470.1
Paramecium tetraurelia	XP_001436859.1
Paramecium tetraurelia	XP_001452274.1
Paramecium tetraurelia	XP_001450750.1
Paramecium tetraurelia	XP_001446187.1
Paramecium tetraurelia	XP_001442795.1
Paramecium tetraurelia	XP_001435114.1
Paramecium tetraurelia	XP_001442048.1
Paramecium tetraurelia	XP_001459326.1
Paramecium tetraurelia	XP_001443849.1
Paramecium tetraurelia	XP_001427305.1
Paramecium tetraurelia	XP_001430539.1
Paramecium tetraurelia	XP_001427903.1
Paramecium tetraurelia	XP_001452598.1
Paramecium tetraurelia	XP_001453973.1
Paramecium tetraurelia	XP_001459805.1
Paramecium tetraurelia	XP_001431421.1
Paramecium tetraurelia	XP_001437947.1
Paramecium tetraurelia	XP_001455279.1
Paramecium tetraurelia	XP_001460814.1
Paramecium tetraurelia	XP_001457422.1
Paramecium tetraurelia	XP_001433807.1
Paramecium tetraurelia	XP_001435315.1
Paramecium tetraurelia	XP_001431137.1
Paramecium tetraurelia	XP_001430537.1
Paramecium tetraurelia	XP_001432498.1
Paramecium tetraurelia	XP_001447978.1
Paramecium tetraurelia	XP_001425668.1
Paramecium tetraurelia	XP_001449787.1
Paramecium tetraurelia	XP_001445445.1
Paramecium tetraurelia	XP_001452889.1
Paramecium tetraurelia	XP_001452171.1
Paramecium tetraurelia	XP_001433310.1
Paramecium tetraurelia	XP_001434453.1
Paramecium tetraurelia	XP_001461118.1
Paramecium tetraurelia	XP_001442326.1
Paramecium tetraurelia	XP_001426596.1
Paramecium tetraurelia	XP_001427005.1
Paramecium tetraurelia	XP_001459171.1
Paramecium tetraurelia	XP_001441995.1
Paramecium tetraurelia	XP_001431888.1
Paramecium tetraurelia	XP_001459201.1
Paramecium tetraurelia	XP_001446512.1
Paramecium tetraurelia	XP_001455715.1
Paramecium tetraurelia	XP_001452127.1
Paramecium tetraurelia	XP_001459125.1
Paramecium tetraurelia	XP_001446371.1
Paramecium tetraurelia	XP_001430536.1
Paramecium tetraurelia	XP_001443370.1
Paramecium tetraurelia	XP_001433204.1
Paramecium tetraurelia	XP_001445111.1
Paramecium tetraurelia	XP_001442866.1
Paramecium tetraurelia	XP_001455725.1
Paramecium tetraurelia	XP_001423708.1
Paramecium tetraurelia	XP_001429351.1
Paramecium tetraurelia	XP_001434418.1
Paramecium tetraurelia	XP_001432499.1
Paramecium tetraurelia	XP_001438345.1
Paramecium tetraurelia	XP_001459124.1
Paramecium tetraurelia	XP_001431138.1
Paramecium tetraurelia	XP_001440719.1
Paramecium tetraurelia	XP_001452465.1
Paramecium tetraurelia	XP_001433309.1
Paramecium tetraurelia	XP_001446127.1
Paramecium tetraurelia	XP_001429944.1
Paramecium tetraurelia	XP_001459820.1
Paramecium tetraurelia	XP_001427970.1
Perkinsus marinus	XP_002777185.1
Perkinsus marinus	XP_002778573.1
Perkinsus marinus	XP_002775570.1
Perkinsus marinus	XP_002773704.1
Perkinsus marinus	XP_002777833.1
Perkinsus marinus	XP_002776068.1
Perkinsus marinus	XP_002780256.1
Perkinsus marinus	XP_002773703.1
Perkinsus marinus	XP_002768944.1
Perkinsus marinus	XP_002764891.1
Perkinsus marinus	XP_002773018.1
Perkinsus marinus	XP_002765622.1
Perkinsus marinus	XP_002780502.1
Perkinsus marinus	XP_002768244.1
Perkinsus marinus	XP_002787429.1
Perkinsus marinus	XP_002785728.1
Perkinsus marinus	XP_002785727.1
Perkinsus marinus	XP_002777844.1
Perkinsus marinus	XP_002781353.1
Perkinsus marinus	XP_002784822.1
Perkinsus marinus	XP_002770928.1
Perkinsus marinus	XP_002778262.1
Perkinsus marinus	XP_002764835.1
Perkinsus marinus	XP_002768068.1
Perkinsus marinus	XP_002767325.1
Perkinsus marinus	XP_002781701.1
Perkinsus marinus	XP_002788107.1
Perkinsus marinus	XP_002768245.1
Perkinsus marinus	XP_002764899.1
Perkinsus marinus	XP_002776503.1
Perkinsus marinus	XP_002777503.1
Perkinsus marinus	XP_002774090.1
Perkinsus marinus	XP_002785119.1
Perkinsus marinus	XP_002788906.1
Perkinsus marinus	XP_002784794.1
Perkinsus marinus	XP_002784928.1
Perkinsus marinus	XP_002774089.1
Perkinsus marinus	XP_002774056.1
Perkinsus marinus	XP_002782720.1
Perkinsus marinus	XP_002772931.1
Perkinsus marinus	XP_002787594.1
Perkinsus marinus	XP_002765443.1
Perkinsus marinus	XP_002788053.1
Perkinsus marinus	XP_002777318.1
Perkinsus marinus	XP_002767052.1
Perkinsus marinus	XP_002764900.1
Perkinsus marinus	XP_002779773.1
Perkinsus marinus	XP_002765948.1
Perkinsus marinus	XP_002776377.1
Perkinsus marinus	XP_002788743.1
Perkinsus marinus	XP_002772750.1
Perkinsus marinus	XP_002787671.1
Perkinsus marinus	XP_002778794.1
Perkinsus marinus	XP_002766865.1
Perkinsus marinus	XP_002773743.1
Perkinsus marinus	XP_002782423.1
Perkinsus marinus	XP_002764895.1
Perkinsus marinus	XP_002769609.1
Perkinsus marinus	XP_002788185.1
Perkinsus marinus	XP_002788031.1
Perkinsus marinus	XP_002785470.1
Perkinsus marinus	XP_002780412.1
Phaeodactylum tricornutum	XP_002184712.1
Phaeodactylum tricornutum	XP_002183547.1
Phaeodactylum tricornutum	XP_002180128.1
Phaeodactylum tricornutum	XP_002185715.1
Phaeodactylum tricornutum	XP_002177113.1
Phaeodactylum tricornutum	XP_002184938.1
Phaeodactylum tricornutum	XP_002181224.1
Phaeodactylum tricornutum	XP_002176951.1
Phaeodactylum tricornutum	XP_002177405.1
Phaeodactylum tricornutum	XP_002184484.1
Phaeodactylum tricornutum	XP_002178495.1
Phaeodactylum tricornutum	XP_002184022.1
Phaeodactylum tricornutum	XP_002183853.1
Phaeodactylum tricornutum	XP_002180584.1
Phaeodactylum tricornutum	XP_002178512.1
Phaeodactylum tricornutum	XP_002181095.1
Phaeodactylum tricornutum	XP_002181815.1
Phaeodactylum tricornutum	XP_002185141.1
Phaeodactylum tricornutum	XP_002184829.1
Phaeodactylum tricornutum	XP_002186029.1
Phaeodactylum tricornutum	XP_002179990.1
Phaeodactylum tricornutum	XP_002179991.1
Phaeodactylum tricornutum	XP_002184506.1
Phaeodactylum tricornutum	XP_002181119.1
Phaeodactylum tricornutum	XP_002186328.1
Phaeodactylum tricornutum	XP_002180544.1
Phaeodactylum tricornutum	XP_002181928.1
Phaeodactylum tricornutum	XP_002185480.1
Phaeodactylum tricornutum	XP_002184909.1
Phaeodactylum tricornutum	XP_002185890.1
Phaeodactylum tricornutum	XP_002184898.1
Phaeodactylum tricornutum	XP_002177318.1
Phaeodactylum tricornutum	XP_002176746.1
Phaeodactylum tricornutum	XP_002182415.1
Phaeodactylum tricornutum	XP_002184859.1
Phaeodactylum tricornutum	XP_002180543.1
Phaeodactylum tricornutum	XP_002177986.1
Phaeodactylum tricornutum	XP_002185354.1
Phaeodactylum tricornutum	XP_002180400.1
Phaeodactylum tricornutum	XP_002179056.1
Phaeodactylum tricornutum	XP_002177033.1
Phaeodactylum tricornutum	XP_002177346.1
Phaeodactylum tricornutum	XP_002183690.1
Phaeodactylum tricornutum	XP_002179198.1
Phaeodactylum tricornutum	XP_002178530.1
Phaeodactylum tricornutum	XP_002178565.1
Phaeodactylum tricornutum	XP_002186471.1
Phaeodactylum tricornutum	XP_002182558.1
Phaeodactylum tricornutum	XP_002178526.1
Phaeodactylum tricornutum	XP_002182743.1
Phaeodactylum tricornutum	XP_002182059.1
Phaeodactylum tricornutum	XP_002178666.1
Phaeodactylum tricornutum	XP_002180536.1
Phaeodactylum tricornutum	XP_002180033.1
Phaeodactylum tricornutum	XP_002185866.1
Phaeodactylum tricornutum	XP_002182348.1
Phaeodactylum tricornutum	XP_002181098.1
Phaeodactylum tricornutum	XP_002184136.1
Phaeodactylum tricornutum	XP_002185091.1
Phaeodactylum tricornutum	XP_002176773.1
Phaeodactylum tricornutum	XP_002180122.1
Phaeodactylum tricornutum	XP_002178893.1
Phaeodactylum tricornutum	XP_002181190.1
Phaeodactylum tricornutum	XP_002183595.1
Plasmodium falciparum	XP_001347650.1
Plasmodium falciparum	XP_001350397.1
Plasmodium falciparum	XP_001349285.1
Plasmodium falciparum	XP_001351926.1
Plasmodium falciparum	XP_001351960.1
Plasmodium falciparum	XP_002808646.1
Plasmodium falciparum	XP_002808609.1
Plasmodium falciparum	XP_001349415.1
Plasmodium falciparum	XP_001350431.1
Plasmodium falciparum	XP_001350804.1
Plasmodium falciparum	XP_001350635.1
Plasmodium falciparum	XP_001347336.1
Plasmodium falciparum	XP_001351019.1
Plasmodium falciparum	XP_024328986.1
Porphyridium purpureum	KAA8491477.1
Porphyridium purpureum	KAA8493919.1
Porphyridium purpureum	KAA8492517.1
Porphyridium purpureum	KAA8494193.1
Porphyridium purpureum	KAA8496533.1
Porphyridium purpureum	KAA8497099.1
Porphyridium purpureum	KAA8495075.1
Porphyridium purpureum	KAA8492622.1
Porphyridium purpureum	KAA8498407.1
Porphyridium purpureum	KAA8496366.1
Porphyridium purpureum	KAA8492751.1
Porphyridium purpureum	KAA8494571.1
Porphyridium purpureum	KAA8498969.1
Porphyridium purpureum	KAA8500065.1
Porphyridium purpureum	KAA8495615.1
Porphyridium purpureum	KAA8494923.1
Porphyridium purpureum	KAA8492189.1
Porphyridium purpureum	KAA8494552.1
Porphyridium purpureum	KAA8495048.1
Porphyridium purpureum	KAA8494092.1
Porphyridium purpureum	KAA8492758.1
Porphyridium purpureum	KAA8498532.1
Porphyridium purpureum	KAA8494250.1
Porphyridium purpureum	KAA8494335.1
Porphyridium purpureum	KAA8499634.1
Porphyridium purpureum	KAA8498333.1
Porphyridium purpureum	KAA8490482.1
Porphyridium purpureum	KAA8492550.1
Porphyridium purpureum	KAA8493582.1
Porphyridium purpureum	KAA8495153.1
Porphyridium purpureum	KAA8495512.1
Porphyridium purpureum	KAA8497367.1
Porphyridium purpureum	KAA8495506.1
Porphyridium purpureum	KAA8499080.1
Porphyridium purpureum	KAA8496634.1
Porphyridium purpureum	KAA8497945.1
Porphyridium purpureum	KAA8496836.1
Porphyridium purpureum	KAA8497244.1
Porphyridium purpureum	KAA8494800.1
Porphyridium purpureum	KAA8499019.1
Porphyridium purpureum	KAA8491163.1
Reticulomyxa filosa	ETO09453.1
Reticulomyxa filosa	ETO14103.1
Reticulomyxa filosa	ETO22507.1
Reticulomyxa filosa	ETO31518.1
Reticulomyxa filosa	ETO24829.1
Reticulomyxa filosa	ETO25929.1
Reticulomyxa filosa	ETO01206.1
Reticulomyxa filosa	ETO22745.1
Reticulomyxa filosa	ETO30307.1
Reticulomyxa filosa	ETO34221.1
Reticulomyxa filosa	ETO16951.1
Reticulomyxa filosa	ETO29591.1
Reticulomyxa filosa	ETO13132.1
Reticulomyxa filosa	ETO30871.1
Reticulomyxa filosa	ETO31142.1
Reticulomyxa filosa	ETO31910.1
Reticulomyxa filosa	ETO30407.1
Reticulomyxa filosa	ETO26355.1
Reticulomyxa filosa	ETO23119.1
Reticulomyxa filosa	ETO20322.1
Reticulomyxa filosa	ETO31247.1
Reticulomyxa filosa	ETO33668.1
Reticulomyxa filosa	ETO23118.1
Reticulomyxa filosa	ETO22576.1
Reticulomyxa filosa	ETO25611.1
Reticulomyxa filosa	ETO10715.1
Reticulomyxa filosa	ETO05847.1
Reticulomyxa filosa	ETO24826.1
Reticulomyxa filosa	ETO28960.1
Reticulomyxa filosa	ETO09516.1
Reticulomyxa filosa	ETN97250.1
Reticulomyxa filosa	ETO27266.1
Reticulomyxa filosa	ETO16848.1
Reticulomyxa filosa	ETO15451.1
Reticulomyxa filosa	ETO30210.1
Reticulomyxa filosa	ETO06828.1
Reticulomyxa filosa	ETO29193.1
Reticulomyxa filosa	ETO17596.1
Reticulomyxa filosa	ETO28018.1
Reticulomyxa filosa	ETO11560.1
Reticulomyxa filosa	ETO32298.1
Reticulomyxa filosa	ETO07168.1
Reticulomyxa filosa	ETO21347.1
Reticulomyxa filosa	ETO00070.1
Reticulomyxa filosa	ETO24825.1
Reticulomyxa filosa	ETO27923.1
Reticulomyxa filosa	ETO15450.1
Reticulomyxa filosa	ETO03758.1
Reticulomyxa filosa	ETO25848.1
Reticulomyxa filosa	ETO30651.1
Reticulomyxa filosa	ETO21726.1
Rhizopus delemar	EIE86128.1
Rhizopus delemar	EIE89730.1
Rhizopus delemar	EIE78757.1
Rhizopus delemar	EIE81372.1
Rhizopus delemar	EIE75859.1
Rhizopus delemar	EIE80656.1
Rhizopus delemar	EIE76032.1
Rhizopus delemar	EIE82708.1
Rhizopus delemar	EIE88097.1
Rhizopus delemar	EIE80954.1
Rhizopus delemar	EIE87421.1
Rhizopus delemar	EIE85742.1
Rhizopus delemar	EIE85725.1
Rhizopus delemar	EIE84273.1
Rhizopus delemar	EIE77147.1
Rhizopus delemar	EIE90119.1
Rhizopus delemar	EIE85170.1
Rhizopus delemar	EIE89655.1
Rhizopus delemar	EIE87999.1
Rhizopus delemar	EIE84930.1
Rhizopus delemar	EIE77886.1
Rhizopus delemar	EIE90767.1
Rhizopus delemar	EIE81148.1
Rhizopus delemar	EIE81090.1
Rhizopus delemar	EIE79377.1
Rhizopus delemar	EIE89895.1
Rhizopus delemar	EIE84262.1
Rhizopus delemar	EIE79702.1
Rhizopus delemar	EIE82855.1
Rhizopus delemar	EIE80776.1
[truncated: 448 more rows]

## Sheet: Ortholog Table
Species	Accession Number	Highly similar sequences	Ortholog
Acanthamoeba castellanii	XP_004336520.1	XP_004340476.1	Outlier
Acanthamoeba castellanii	XP_004344643.1		Mir1
Acanthamoeba castellanii	XP_004356622.1		Pic2
Amphimedon queenslandica	XP_003382976.1		Pic2
Arabidopsis thaliana	NP_179319.1		Pic2
Arabidopsis thaliana	NP_190454.1		Pic2
Arabidopsis thaliana	NP_196908.1		Pic2
Blastocystis hominis	XP_012897575.1	XP_012896615.1	Pic2
Capsaspora owczarzaki	XP_004347884.2		Pic2
Chlamydomonas reinhardtii	XP_001703471.1	XP_001703470.1	Pic2
Chondrus crispus	XP_005712486.1		Mir1
Chondrus crispus	XP_005714940.1		Pic2
Chrysochromulina tobinii	KOO33688.1		Mir1
Chrysochromulina tobinii	KOO34980.1		Mir1
Chrysochromulina tobinii	KOO53657.1		Outlier
Cryptosporidium parvum	XP_626289.1		Pic2
Cyanidioschyzon merolae	XP_005537771.1		Mir1
Cyanidioschyzon merolae	XP_005539349.1		Mir1
Danio rerio	NP_001315501.1	NP_957009.1, XP_005164785.1	Pic2
Danio rerio	NP_998887.1	XP_005170711.1	Pic2
Dictyostelium discoideum	XP_002649113.1		Mir1
Dictyostelium discoideum	XP_629073.2		Mir1
Drosophila melanogaster	NP_001246757.1	NP_729978.1, NP_524069.2	Pic2
Drosophila melanogaster	NP_001286628.1	NP_611468.1, NP_001286629.1	Pic2
Emiliania huxleyi	XP_005756210.1		Mir1
Emiliania huxleyi	XP_005756365.1		Mir1
Emiliania huxleyi	XP_005765013.1		Mir1
Emiliania huxleyi	XP_005768856.1	XP_005793565.1	Outlier
Emiliania huxleyi	XP_005793189.1		Mir1
Emiliania huxleyi	XP_005793819.1	XP_005769400.1	Mir1
Fonticula alba	XP_009492519.1		Pic2
Guillardia theta	XP_005820386.1		Mir1
Guillardia theta	XP_005823247.1		Mir1
Guillardia theta	XP_005825799.1		Mir1
Guillardia theta	XP_005829782.1	XP_005829794.1	Mir1
Guillardia theta	XP_005842015.1		Mir1
Homo sapiens	NP_005879.1	NP_998776.1, NP_002626.1	Pic2
Leishmania major	XP_001687506.1		Pic2
Leishmania major	XP_003722839.1	XP_003722840.1	Pic2
Micromonas commoda	XP_002500224.1		Mir1
Micromonas commoda	XP_002501167.1		Mir1
Monosiga brevicollis	XP_001744152.1		Pic2
Naegleria gruberi	XP_002678545.1		Mir1
Naegleria gruberi	XP_002681706.1		Mir1
Naegleria gruberi	XP_002682974.1		Mir1
Neurospora crassa	XP_011393175.1	XP_011393176.1	Pic2
Neurospora crassa	XP_963478.1		Mir1
Oryza sativa	NP_001048232.1		Pic2
Oryza sativa	NP_001049633.1		Pic2
Oryza sativa	NP_001052925.1		Pic2
Oryza sativa	NP_001057115.1		Pic2
Oryza sativa	NP_001063353.1		Pic2
Oryza sativa	NP_001063885.2		Pic2
Paramecium tetraurelia	XP_001427305.1	XP_001427305.1	Pic2
Perkinsus marinus	XP_002774056.1		Pic2
Perkinsus marinus	XP_002774089.1	XP_002778794.1	Pic2
Perkinsus marinus	XP_002774090.1		Pic2
Perkinsus marinus	XP_002777318.1		Pic2
Phaeodactylum tricornutum	XP_002177346.1		Mir1
Phaeodactylum tricornutum	XP_002178565.1		Mir1
Phaeodactylum tricornutum	XP_002179056.1		Mir1
Phaeodactylum tricornutum	XP_002179198.1		Mir1
Phaeodactylum tricornutum	XP_002182415.1		Mir1
Phaeodactylum tricornutum	XP_002182558.1		Pic2
Phaeodactylum tricornutum	XP_002182743.1		Pic2
Plasmodium falciparum	XP_001350431.1		Pic2
Porphyridium purpureum	KAA8493582.1		Mir1
Porphyridium purpureum	KAA8496836.1		Pic2
Reticulomyxa filosa	ETO29591.1		Pic2
Rhizopus delemar	EIE80197.1	EIE92433.1	Mir1
Rhizopus delemar	EIE83470.1		Pic2
Saccharomyces cerevisiae	NP_010973.3		Pic2
Saccharomyces cerevisiae	NP_012611.1		Mir1
Spizellomyces punctatus	XP_016604221.1		Pic2
Spizellomyces punctatus	XP_016612314.1		Pic2
Strongylocentrotus purpuratus	XP_030840586.1	XP_030854623.1	Pic2
Strongylocentrotus purpuratus	XP_783048.2		Pic2
Tetrahymena thermophila	XP_001023482.1		Pic2
Thalassiosira pseudonana	XP_002287546.1		Mir1
Thalassiosira pseudonana	XP_002289025.1		Mir1
Thalassiosira pseudonana	XP_002289288.1		Mir1
Thalassiosira pseudonana	XP_002290612.1		Mir1
Thalassiosira pseudonana	XP_002293146.1		Mir1
Thalassiosira pseudonana	XP_002295569.1		Mir1
Thecamonas trahens	XP_013758005.1		Pic2
Toxoplasma gondii	XP_002370602.1		Pic2
Trypanosoma brucei	XP_011776787.1		Pic2
Trypanosoma brucei	XP_011778441.1		Pic2
Ustilago maydis	XP_011386320.1		Mir1
Ustilago maydis	XP_011388175.1		Mir1

## Sheet: Position summary
Position	ScPIC2 aa	ScPIC2 pos	PIC2 Entropy	PIC2 aa	ScMIR1 Pos	ScMIR1 aa	MIR1 Entropy	MIR1 aa	Same	Secondary structure	Motifs	Identity
1	-	0	0.11925	-	0	-	0	-	1
2	-	0	0.11925	-	0	-	0	-	1
3	-	0	0.11925	-	0	-	0	-	1
4	-	0	0.11925	-	0	-	0	-	1
5	-	0	0.11925	-	0	-	0	-	1
6	-	0	0.11925	-	0	-	0	-	1
7	-	0	0.11925	-	0	-	0	-	1
8	-	0	0.11925	-	0	-	0	-	1
9	-	0	0.11925	-	0	-	0	-	1
10	-	0	0.11925	-	0	-	0	-	1
11	-	0	0.11925	-	0	-	0	-	1
12	-	0	0.11925	-	0	-	0	-	1
13	-	0	0.11925	-	0	-	0	-	1
14	-	0	0.11925	-	0	-	0	-	1
15	-	0	0.11925	-	0	-	0	-	1
16	-	0	0.11925	-	0	-	0	-	1
17	-	0	0.11925	-	0	-	0	-	1
18	-	0	0.11925	-	0	-	0	-	1
19	-	0	0.11925	-	0	-	0	-	1
20	-	0	0.11925	-	0	-	0	-	1
21	-	0	0.11925	-	0	-	0	-	1
22	-	0	0.11925	-	0	-	0	-	1
23	-	0	0.11925	-	0	-	0	-	1
24	-	0	0.11925	-	0	-	0	-	1
25	-	0	0.11925	-	0	-	0	-	1
26	-	0	0.11925	-	0	-	0	-	1
27	-	0	0.11925	-	0	-	0	-	1
28	-	0	0.11925	-	0	-	0	-	1
29	-	0	0.11925	-	0	-	0	-	1
30	-	0	0.11925	-	0	-	0	-	1
31	-	0	0.11925	-	0	-	0	-	1
32	-	0	0.11925	-	0	-	0	-	1
33	-	0	0.11925	-	0	-	0	-	1
34	-	0	0.11925	-	0	-	0	-	1
35	-	0	0.11925	-	0	-	0	-	1
36	-	0	0.11925	-	0	-	0	-	1
37	-	0	0.11925	-	0	-	0	-	1
38	-	0	0.11925	-	0	-	0	-	1
39	-	0	0.11925	-	0	-	0	-	1
40	-	0	0.11925	-	0	-	0	-	1
41	-	0	0.11925	-	0	-	0	-	1
42	-	0	0.11925	-	0	-	0	-	1
43	-	0	0.11925	-	0	-	0	-	1
44	-	0	0.11925	-	0	-	0	-	1
45	-	0	0.11925	-	0	-	0	-	1
46	-	0	0.11925	-	0	-	0	-	1
47	-	0	0.11925	-	0	-	0	-	1
48	-	0	0.11925	-	0	-	0	-	1
49	-	0	0.11925	-	0	-	0	-	1
50	-	0	0.11925	-	0	-	0	-	1
51	-	0	0.11925	-	0	-	0	-	1
52	-	0	0.11925	-	0	-	0	-	1
53	-	0	0.11925	-	0	-	0	-	1
54	-	0	0.11925	-	0	-	0	-	1
55	-	0	0.11925	-	0	-	0	-	1
56	-	0	0.11925	-	0	-	0	-	1
57	-	0	0.11925	-	0	-	0	-	1
58	-	0	0.11925	-	0	-	0	-	1
59	-	0	0.11925	-	0	-	0	-	1
60	-	0	0.11925	-	0	-	0	-	1
61	-	0	0.11925	-	0	-	0	-	1
62	-	0	0.11925	-	0	-	0	-	1
63	-	0	0.11925	-	0	-	0	-	1
64	-	0	0.11925	-	0	-	0	-	1
65	-	0	0.11925	-	0	-	0	-	1
66	-	0	0.11925	-	0	-	0	-	1
67	-	0	0.11925	-	0	-	0	-	1
68	-	0	0.11925	-	0	-	0	-	1
69	-	0	0.11925	-	0	-	0	-	1
70	-	0	0.11925	-	0	-	0	-	1
71	-	0	0.11925	-	0	-	0	-	1
72	-	0	0.11925	-	0	-	0	-	1
73	-	0	0.11925	-	0	-	0	-	1
74	-	0	0.11925	-	0	-	0	-	1
75	-	0	0.23782	-	0	-	0	-	1
76	-	0	0.23782	-	0	-	0	-	1
77	-	0	0.23782	-	0	-	0	-	1
78	-	0	0.23782	-	0	-	0	-	1
79	-	0	0.3557	-	0	-	0	-	1
80	-	0	0.3557	-	0	-	0	-	1
81	-	0	0.3557	-	0	-	0	-	1
82	-	0	0.3557	-	0	-	0	-	1
83	-	0	0.47286	-	0	-	0	-	1
84	-	0	0.47286	-	0	-	0	-	1
85	-	0	0.47286	-	0	-	0	-	1
86	-	0	0.47286	-	0	-	0	-	1
87	-	0	0.47286	-	0	-	0	-	1
88	-	0	0.47286	-	0	-	0.12693	-	1
89	-	0	0.43732	-	0	-	0.12693	-	1
90	-	0	0.40177	-	0	-	0.12693	-	1
91	-	0	0.43732	-	0	-	0.25307	-	1
92	-	0	0.47286	-	0	-	0.37839	-	1
93	-	0	0.66943	-	0	-	0.50286	-	1
94	-	0	0.81988	-	0	-	0.54946	-	1
95	-	0	0.81988	-	0	-	0.58797	-	1
96	-	0	0.90507	-	0	-	0.62647	-	1
97	-	0	1.16457	-	0	-	0.58797	-	1
98	-	0	1.31074	-	0	-	0.58797	-	1
99	-	0	1.23964	-	0	-	0.71068	-	1
100	-	0	1.07063	-	0	-	0.67217	-	1
101	-	0	1.2041	-	0	-	0.83247	-	1
102	-	0	1.17727	-	0	-	0.90025	-	1
103	-	0	1.34931	-	0	-	0.91479	-	1
104	-	0	1.48013	-	0	-	0.83777	-	1
105	-	0	1.40903	-	0	-	0.99612	-	1
106	-	0	1.43116	-	0	-	1.02009	-	1
107	-	0	1.51664	-	0	-	0.95761	-	1
108	-	0	1.58773	-	0	-	0.99612	-	1
109	-	0	1.59998	-	0	-	1.07313	-	1
110	-	0	1.65766	-	0	-	1.15343	-	1
111	-	0	1.57315	-	0	-	1.1389	-	1
112	-	0	1.86505	-	0	-	1.15343	-	1
113	-	0	1.84502	-	0	-	1.15343	-	1
114	-	0	1.79784	-	0	-	1.11492	-	1
115	-	0	1.81125	-	0	-	1.11492	-	1
116	-	0	1.87438	-	0	-	1.10039	-	1
117	-	0	1.93206	-	0	-	1.19194	-	1
118	-	0	1.76127	-	0	-	1.02337	-	1
119	-	0	1.82542	-	0	-	1.00692	-	1
120	-	0	1.80036	-	0	-	1.15343	-	1
121	-	0	1.93746	-	0	-	1.15343	-	1
122	-	0	1.95265	-	0	-	1.06188	-	1
123	-	0	2.14001	-	0	-	1.11492	-	1
124	-	0	2.2255	-	0	-	1.1026	-	1
125	-	0	2.22728	-	0	-	1.27117	-	1
126	-	0	2.21856	-	0	-	1.29625	-	1
127	-	0	2.2208	-	0	-	1.48747	-	1
128	-	0	2.14099	-	0	-	1.63898	-	1
129	-	0	2.14277	-	0	-	1.41545	-	1
130	-	0	2.23599	-	0	-	1.47041	-	1
131	-	0	2.26891	-	0	-	1.53799	-	1
132	-	0	1.97478	-	0	-	1.50892	-	1
133	-	0	2.24994	-	0	-	1.87821	-	1
134	-	0	2.40002	-	0	-	1.96152	-	1
135	-	0	2.34411	-	0	-	1.77842	-	1
136	M	1	2.40534	-	0	-	1.8845	-	1
137	E	2	2.51668	A	0	-	1.8845	-	0
138	S	3	2.25961	P	0	-	1.98357	-	0
139	N	4	2.39233	P	0	-	1.85544	-	0
140	K	5	2.44204	A	0	-	1.80749	-	0
141	Q	6	2.62848	A	0	-	1.79295	-	0
142	P	7	2.3745	K	0	-	1.76196	-	0
143	R	8	2.19144	K	0	-	1.72418	-	0
144	-	8	2.03985	W	0	-	1.75325	-	0		V	HELIX	8	8
145	-	8	2.39886	D	0	-	1.85424	-	0		H	HELIX	9	9
146	-	8	1.83953	A	1	M	1.79761	-	0		M	HELIX	10	10
147	-	8	1.90191	R	2	S	1.87462	-	0		F	HELIX	11	11
148	-	8	2.4863	Y	3	V	1.89642	-	0		L	HELIX	12	12
149	-	8	1.82542	A	4	S	1.83953	-	0		I	HELIX	13	13
150	-	8	1.84755	-	4	-	1.19526	-	1
151	-	8	1.6154	-	4	-	1.01216	-	1
152	-	8	1.49456	-	4	-	1.15343	-	1
153	-	8	1.29732	-	4	-	0.98158	-	1
154	-	8	1.00407	-	4	-	0.77019	-	1
155	-	8	0.86289	-	4	-	0.79396	-	1
156	-	8	0.5893	-	4	-	0.77942	-	1
157	-	8	0.55375	-	4	-	0.74092	-	1
158	-	8	0.55375	-	4	-	0.61913	-	1
159	-	8	0.38836	-	4	-	0.50286	-	1
160	-	8	0.43732	-	4	-	0.50286	-	1
161	-	8	0.47286	-	4	-	0.50286	-	1
162	-	8	0.23782	-	4	-	0.50286	-	1
163	-	8	0.11925	-	4	-	0.37839	-	1
164	-	8	0.11925	-	4	-	0.37839	-	1
165	-	8	0.11925	-	4	-	0.25307	-	1
166	-	8	0.11925	-	4	-	0.21456	-	1
167	-	8	0.11925	-	4	-	0.25307	-	1
168	-	8	0.11925	-	4	-	0.25307	-	1
169	-	8	0.11925	-	4	-	0.25307	-	1
170	-	8	0.11925	-	4	-	0.25307	-	1
171	-	8	0.11925	-	4	-	0.37839	-	1
172	-	8	0.11925	-	4	-	0.12693	-	1
173	-	8	0.11925	-	4	-	0.12693	-	1
174	-	8	0	-	4	-	0.12693	-	1
175	-	8	0	-	4	-	0.12693	-	1
176	-	8	0	-	4	-	0.12693	-	1
177	-	8	0	-	4	-	0.12693	-	1
178	-	8	0	-	4	-	0.12693	-	1
179	-	8	0	-	4	-	0.12693	-	1
180	-	8	0	-	4	-	0.12693	-	1
181	-	8	0	-	4	-	0.12693	-	1
182	-	8	0	-	4	-	0.12693	-	1
183	-	8	0	-	4	-	0.12693	-	1
184	-	8	0	-	4	-	0	-	1
185	-	8	0	-	4	-	0	-	1
186	-	8	0	-	4	-	0	-	1
187	-	8	0	-	4	-	0	-	1
188	-	8	0	-	4	-	0	-	1
189	-	8	0	-	4	-	0	-	1
190	-	8	0	-	4	-	0	-	1
191	-	8	0	-	4	-	0	-	1
192	-	8	0	-	4	-	0	-	1
193	-	8	0	-	4	-	0	-	1
194	-	8	0	-	4	-	0	-	1
195	-	8	0	-	4	-	0	-	1
196	-	8	0	-	4	-	0	-	1
197	-	8	0	-	4	-	0	-	1
198	-	8	0.11925	-	4	-	0	-	1
199	-	8	0.11925	-	4	-	0	-	1
200	-	8	0.11925	-	4	-	0.12693	-	1
201	-	8	1.94812	-	5	A	2.29871	-	1
202	-	8	2.1313	-	6	A	2.05747	-	1
203	-	8	2.37966	-	7	P	2.26772	-	1
204	K	9	1.88924	H	8	A	2.37175	-	0
205	I	10	1.99955	I	9	I	2.24169	-	0
206	Q	11	1.84148	E	10	P	2.42368	-	0
207	L	12	1.83421	P	11	Q	2.32188	P	1
208	Y	13	1.36039	H	12	Y	2.312	F	0
209	T	14	1.18836	S	13	S	1.78791	G	0
210	-	14	0	-	13	-	0	-	1
211	-	14	0	-	13	-	0	-	1
212	-	14	0	-	13	-	0	-	1
213	-	14	0	-	13	-	0	-	1
214	-	14	0	-	13	-	0	-	1
215	-	14	0	-	13	-	0	-	1
216	-	14	0	-	13	-	0	-	1
217	-	14	0	-	13	-	0	-	1
218	-	14	0	-	13	-	0	-	1
219	-	14	0	-	13	-	0	-	1
220	-	14	0	-	13	-	0	-	1
221	-	14	0	-	13	-	0	-	1
222	K	15	1.96305	N	14	V	2.11319	L	0
223	E	16	2.19276	A	15	S	2.29983	D	0
224	F	17	0.47061	Y	16	D	2.22988	Y	1	Helix1
225	Y	18	0.54423	Y	17	Y	1.17239	Y	1	Helix1
226	A	19	1.74016	A	18	M	2.25318	L	0	Helix1
227	T	20	1.45942	K	19	K	1.66409	K	1	Helix1
228	C	21	0	C	20	F	1.74891	F	0	Helix1
229	T	22	1.89577	G	21	A	1.46843	A	0	Helix1
230	L	23	1.89767	L	22	L	1.38122	L	1	Helix1
231	-	23	0	-	22	-	0	-	1
232	-	23	0	-	22	-	0	-	1
233	-	23	0	-	22	-	0	-	1
234	-	23	0	-	22	-	0	-	1
235	-	23	0	-	22	-	0	-	1
236	-	23	0	-	22	-	0	-	1
237	-	23	0	-	22	-	0	-	1
238	-	23	0	-	22	-	0	-	1
239	-	23	0	-	22	-	0	-	1
240	-	23	0	-	22	-	0	-	1
241	-	23	0	-	22	-	0	-	1
242	-	23	0	-	22	-	0	-	1
243	-	23	0	-	22	-	0	-	1
244	-	23	0	-	22	-	0	-	1
245	-	23	0	-	22	-	0	-	1
246	-	23	0	-	22	-	0	-	1
247	-	23	0	-	22	-	0	-	1
248	G	24	0.38836	G	23	A	0.84281	A	0	Helix1		π	ODD TMH Motif 1B
249	G	25	0	G	24	G	0	G	1	Helix1	πGπxπGπ	G
250	I	26	1.37897	I	25	A	0.78125	G	0	Helix1		π
251	I	27	0.99378	L	26	I	1.59345	I	0	Helix1		x
252	A	28	0.61724	S	27	G	0.86756	C	0	Helix1		π
253	C	29	0.23782	C	28	C	0.88132	C	1	Helix1		G
254	G	30	0.11925	G	29	G	1.39649	S	0	Helix1		π
255	P	31	1.29013	L	30	S	1.63947	I	0	Helix1
256	T	32	0.11925	T	31	T	0.99247	T	1	Helix1
257	H	33	0.11925	H	32	H	0	H	1	Helix1
258	S	34	1.05544	T	33	S	1.38431	G	0	Helix1
259	S	35	1.37349	A	34	S	1.60985	A	1	Helix1
260	I	36	1.06584	V	35	M	1.68539	L	0	Helix1
261	T	37	0.92273	T	36	V	1.07115	T	1	Helix1
262	P	38	0	P	37	P	0	P	1	Helix1	PX(D/E)XX(R/K)	P	ODD TMH Motif 1A
263	L	39	0.33068	L	38	I	1.18492	V	0	Helix1		X
264	D	40	0	D	39	D	0	D	1	Helix1		D
265	L	41	0.78242	V	40	V	0.12693	V	1	Helix1		X
266	V	42	1.00005	V	41	V	0.21456	V	1	Helix1		X
267	K	43	0	K	42	K	0	K	1	Helix1		K
268	C	44	0.46924	C	43	T	0.12693	T	0	Helix1
269	R	45	0.937	N	44	R	0.56609	R	0	Helix1
270	L	46	1.21885	M	45	I	1.7104	I	0	Helix1
271	Q	47	0	Q	46	Q	0	Q	1	Helix1
272	-	47	0.11925	-	46	-	0	-	1
273	-	47	0.11925	-	46	-	0	-	1
274	V	48	1.05459	V	47	L	1.36037	L	0	Helix1
275	N	49	1.26214	D	48	E	1.90903	D	1	Helix1
276	P	50	0.3557	P	49	P	0.42585	P	1	Helix1
277	-	50	0	-	49	-	0.46436	-	1
278	K	51	2.13955	A	50	T	2.44013	G	0	Helix1
279	L	52	0.84947	K	51	V	1.87996	K	1	Helix1
280	Y	53	0.49864	Y	52	Y	0.74919	Y	1
281	-	53	0	-	52	-	0.25307	-	1
282	-	53	0.32015	-	53	N	0.78125	-	1
283	T	54	1.34762	K	54	K	2.06207	K	1
284	-	54	0	-	54	-	0.12693	-	1
285	-	54	0	-	54	-	0.71068	-	1
286	S	55	1.33685	S	55	G	0.8496	G	0
287	-	55	0	-	55	-	0.12693	-	1
288	-	55	0	-	55	-	0.12693	-	1
289	N	56	1.10302	L	56	M	1.53557	M	0
290	L	57	2.12213	F	57	V	2.12569	I	0
291	Q	58	1.60521	S	58	G	2.24325	G	0
292	G	59	0.50479	G	59	S	1.33041	G	1
293	F	60	1.23768	F	60	F	1.59805	F	1
294	R	61	1.41963	R	61	K	1.88712	R	1
295	K	62	1.71151	T	62	Q	1.6668	Q	0
296	-	62	0.23782	-	62	-	0	-	1
297	I	63	1.37694	I	63	I	0.95448	I	1
298	I	64	1.9354	L	64	I	1.55352	V	0
299	-	64	0.11925	-	64	-	0	-	1
300	-	64	0.11925	-	64	-	0	-	1
301	-	64	0.11925	-	64	-	0	-	1
302	-	64	0.11925	-	64	-	0	-	1
303	-	64	0.11925	-	64	-	0	-	1
304	-	64	0.11925	-	64	-	0	-	1
305	-	64	0.11925	-	64	-	0	-	1
306	-	64	0.11925	-	64	-	0	-	1
307	A	65	1.5127	A	65	A	1.92691	K	0
308	-	65	0	-	65	-	0	-	1
309	N	66	0.93398	E	66	G	1.73047	E	1
310	E	67	1.1895	E	67	E	0.79396	E	1
311	-	67	0.20227	-	67	-	0	-	1
312	-	67	0.23782	-	67	-	0	-	1
313	G	68	0.3557	G	68	G	0	G	1
314	-	68	0.3557	-	68	-	0.42585	-	1
315	W	69	1.89826	A	69	A	1.74501	A	1
316	K	70	1.43036	R	70	G	1.89257	G	0	Helix2
317	-	70	0.23782	-	70	-	0	-	1
318	K	71	0.98612	G	71	A	1.3934	A	0	Helix2
319	-	71	0	-	71	-	0	-	1
320	-	71	0	-	71	-	0	-	1
321	-	71	0	-	71	-	0	-	1
322	-	71	0	-	71	-	0	-	1
323	-	71	0	-	71	-	0	-	1
324	-	71	0	-	71	-	0.12693	-	1
325	V	72	1.03811	L	72	L	0.33988	L	1	Helix2
326	Y	73	2.14133	F	73	L	1.11824	L	0	Helix2
327	-	73	0	-	73	-	0	-	1
328	-	73	0	-	73	-	0	-	1
329	-	73	0	-	73	-	0	-	1
330	-	73	0	-	73	-	0	-	1
331	-	73	0	-	73	-	0	-	1
332	-	73	0	-	73	-	0	-	1
333	-	73	0	-	73	-	0	-	1
334	-	73	0	-	73	-	0	-	1
335	T	74	1.12315	K	74	T	1.69511	T	0	Helix2
336	G	75	0.11925	G	75	G	0	G	1	Helix2
337	F	76	0.66943	W	76	F	1.52712	L	0	Helix2
338	G	77	1.89296	A	77	G	1.47294	G	0	Helix2
339	A	78	0.32015	P	78	P	0.81357	P	1	Helix2
340	T	79	0.11925	T	79	T	0.12693	T	1	Helix2
341	F	80	1.24265	L	80	L	1.69327	A	0	Helix2
342	V	81	1.2896	I	81	L	2.05822	V	0	Helix2
343	G	82	0.11925	G	82	G	0	G	1	Helix2	πXXXXπ	π	EVEN Motif 1B
344	Y	83	0	Y	83	Y	0.40294	Y	1	Helix2		X
345	S	84	0.47286	S	84	S	1.48611	F	0	Helix2		X
346	L	85	1.39064	A	85	I	1.58899	I	0	Helix2		X
347	Q	86	0	Q	86	Q	1.27881	Q	1	Helix2		X
348	G	87	0.11925	G	87	G	0	G	1	Helix2		π
349	A	88	1.41241	A	88	A	1.6196	A	1	Helix2
350	G	89	1.36546	C	89	F	1.54227	F	0	Helix2
351	K	90	0.11925	K	90	K	0.74092	K	1	Helix2
352	Y	91	0.47061	F	91	F	0.56234	F	1	Helix2
353	G	92	0.11925	G	92	G	0.88059	G	1	Helix2
354	G	93	0.86707	L	93	G	1.56823	G	0	Helix2
355	Y	94	0.27119	Y	94	Y	0.95639	Y	1	Helix2	(Y/F)(D/E)XX(R/K)	Y	EVEN Motif 1A
356	E	95	0	E	95	E	0.37839	E	1	Helix2		E
357	-	95	0	-	95	-	0	-	1				ODD Motif 1A
358	-	95	0	-	95	-	0	-	1
359	-	95	0	-	95	-	0	-	1
360	-	95	0	-	95	-	0	-	1
361	-	95	0	-	95	-	0	-	1
362	-	95	0	-	95	-	0	-	1
363	-	95	0	-	95	-	0	-	1
364	-	95	0	-	95	-	0	-	1
365	-	95	0	-	95	-	0	-	1
366	-	95	0	-	95	-	0	-	1
367	-	95	0	-	95	-	0	-	1
368	-	95	0	-	95	-	0	-	1
369	-	95	0	-	95	-	0	-	1
370	-	95	0	-	95	-	0	-	1
371	-	95	0	-	95	-	0	-	1
372	-	95	0	-	95	-	0	-	1
373	-	95	0	-	95	-	0	-	1
374	-	95	0	-	95	-	0	-	1
375	-	95	0	-	95	-	0.12693	-	1
376	-	95	0	-	95	-	0.12693	-	1
377	-	95	0	-	95	-	0.12693	-	1
378	-	95	0	-	95	-	0.12693	-	1
379	-	95	0	-	95	-	0.12693	-	1
380	Y	96	1.69843	V	96	V	1.7929	F	0	Helix2		X
381	F	97	0.23782	F	97	F	1.12466	F	1	Helix2		X
382	K	98	0	K	98	K	0.41131	K	1	Helix2		K
383	-	98	0	-	98	-	0.12693	-	1
384	-	98	0	-	98	-	0.21456	-	1
385	-	98	0	-	98	-	0.21456	-	1
386	-	98	0	-	98	-	0.37839	-	1
387	H	99	1.53089	D	99	K	2.04052	K	0	Helix2
388	L	100	2.13629	L	100	F	2.53168	Q	0	Helix2
389	Y	101	0.20227	Y	101	F	1.75799	F	0	Helix2
390	S	102	1.5327	S	102	I	1.92226	A	0	Helix2
391	S	103	1.54823	N	103	D	2.19964	S	0	Helix2
392	W	104	1.67452	L	104	N	2.30927	L	1	Helix2
393	-	104	0	-	104	-	0.12693	-	1
394	-	104	0	-	104	-	0.12693	-	1
395	-	104	0	-	104	-	0.12693	-	1
396	-	104	0	-	104	-	0.12693	-	1
397	-	104	0	-	104	-	0.12693	-	1
398	-	104	0	-	104	-	0.12693	-	1
399	-	104	0	-	104	-	0.25307	-	1
400	-	104	0	-	104	-	0.37839	-	1
401	-	104	0	-	104	-	0.46436	-	1
402	-	104	1.43971	L	105	L	1.69792	L	1
403	-	104	0.23782	G	106	G	1.46097	G	1
404	-	104	1.0294	E	107	Y	2.41026	P	0
405	-	104	0	-	107	-	0.12693	-	1
406	-	104	0	-	107	-	0.12693	-	1
407	-	104	0	-	107	-	0.12693	-	1
408	-	104	0	-	107	-	0.12693	-	1
409	-	104	0	-	107	-	0.12693	-	1
410	-	104	0	-	107	-	0.12693	-	1
411	-	104	0	-	107	-	0.12693	-	1
412	-	104	0	-	107	-	0.25307	-	1
413	-	104	0	-	107	-	0.37839	-	1
414	-	104	0.5893	E	108	D	1.8106	E	1
415	-	104	1.52419	N	109	T	2.1576	-	0
416	-	104	1.00005	A	110	A	1.20464	A	1
417	-	104	0	-	110	-	0.91479	-	1
418	-	104	0	-	110	-	1.02009	-	1
419	-	104	0	-	110	-	1.03462	-	1
420	L	105	2.24144	Y	111	S	2.37412	S	0
421	S	106	1.49954	K	112	R	2.41343	E	0
422	P	107	0.64215	Y	113	Y	2.11215	N	0
423	G	108	0.95427	R	114	K	1.76581	R	1
424	V	109	1.50838	T	115	N	2.21145	T	1
425	T	110	1.76551	L	116	S	2.281	P	0	Helix3
426	V	111	1.25387	I	117	V	1.65387	I	1	Helix3
427	-	111	0	-	117	-	0.12693	-	1
428	-	111	0	-	117	-	0.25307	-	1
429	Y	112	0.84279	Y	118	Y	1.84556	Y	1	Helix3
430	L	113	1.21611	L	119	M	1.12768	L	1	Helix3
431	M	114	1.08404	A	120	G	1.80601	A	1	Helix3
432	A	115	0.90765	A	121	S	0.92335	A	1	Helix3
433	S	116	0.32015	S	122	A	1.06926	S	1	Helix3
434	A	117	0.42932	A	123	A	1.14111	A	1	Helix3
435	T	118	0.40177	S	124	M	1.99257	A	0	Helix3		π	ODD Motif 2B
436	A	119	0.11925	A	125	A	0.34883	A	1	Helix3	πGπxπGπ	G
437	E	120	0.11925	E	126	E	1.11693	E	1	Helix3		π
438	F	121	0.92269	F	127	F	1.56669	F	1	Helix3		x
439	L	122	0.99555	F	128	L	1.52587	I	0	Helix3		π
440	A	123	0	A	129	A	0.59516	A	1	Helix3		G
441	D	124	0	D	130	D	1.36508	D	1	Helix3		π
442	I	125	1.12568	I	131	I	1.50624	I	1	Helix3
443	M	126	0.76496	A	132	A	1.76344	A	1	Helix3
444	L	127	0.11925	L	133	L	0.46436	L	1	Helix3
445	C	128	0.75641	C	134	C	0.9191	C	1	Helix3
446	P	129	0	P	135	P	0	P	1	Helix3	PX(D/E)XX(R/K)	P	ODD Motif 2A
447	F	130	0.92273	M	136	L	1.58271	L	0	Helix3		X
448	E	131	0	E	137	E	0.25307	E	1	Helix3		E
449	A	132	0.78242	A	138	A	0.79926	A	1	Helix3		X
450	I	133	1.38994	V	139	T	1.437	T	0	Helix3		X
451	K	134	0	K	140	R	0.21456	R	0	Helix3		K
452	V	135	0.11925	V	141	I	0.12693	I	0	Helix3
453	K	136	0.79462	K	142	R	0.33988	R	0	Helix3
454	Q	137	1.04571	V	143	L	1.60668	L	0	Helix3
455	Q	138	0	Q	144	V	0.21456	V	0	Helix3
456	T	139	0.58472	-	144	-	0	-	1	Helix3
457	-	139	0.11925	-	144	-	0	-	1
458	T	140	0.65833	T	145	S	1.05369	S	0	Helix3
459	M	141	1.79799	Q	146	Q	1.35135	D	0
460	P	142	0.23782	P	147	P	0.58797	P	1
461	-	142	0.11925	-	147	-	0	-	1
462	-	142	0.79462	G	147	-	0.12693	-	0
463	-	142	1.11561	-	147	-	0	-	1
464	-	142	1.09313	-	147	-	0.33988	-	1
465	P	143	1.63072	T	148	Q	1.99736	T	1
466	F	144	0.89038	F	149	F	0.80043	F	1
467	C	145	0.89507	A	150	A	1.37694	A	1
468	N	146	1.69724	T	151	N	1.94382	S	0
469	-	146	0	-	151	-	1.15343	-	1
470	-	146	0	-	151	-	0.12693	-	1
471	N	147	1.62197	G	152	G	0.96416	G	1
472	V	148	1.24383	L	153	L	1.61425	L	1
473	V	149	1.90422	R	154	V	1.82024	V	0
474	D	150	1.58528	D	155	G	1.94086	G	0
475	G	151	1.05988	A	156	G	1.36508	G	0
476	W	152	1.73112	L	157	F	1.83433	F	0
477	K	153	1.56644	P	158	S	2.19182	S	0
478	K	154	1.45896	K	159	R	1.28645	R	0
479	M	155	1.22388	M	160	I	1.18938	L	0
480	Y	156	2.38585	V	161	L	1.96977	L	0
481	A	157	1.69912	A	162	K	1.71357	K	0
482	-	157	0.11925	-	162	-	0	-	1
483	E	158	2.12143	-	163	E	1.45203	E	0
484	-	158	0.23782	-	163	-	0.37839	-	1
485	-	158	0.23782	-	163	-	0.37839	-	1
486	S	159	1.53877	E	164	E	0.75545	E	1
487	G	160	0.98194	-	164	-	1.02009	-	1
488	G	161	1.21014	G	165	G	0.25307	G	1
489	-	161	0	-	165	-	1.0641	-	1
490	-	161	0	-	165	-	0.12693	-	1
491	-	161	0	-	165	-	0.12693	-	1
492	M	162	2.19826	E	166	I	1.5442	L	0
493	K	163	2.11048	T	167	G	2.33722	G	0
494	A	164	1.57076	G	168	S	1.26458	G	1
495	-	164	0	-	168	-	0.12693	-	1
496	-	164	0	-	168	-	0.12693	-	1
497	-	164	0	-	168	-	0.12693	-	1
498	-	164	0	-	168	-	0.12693	-	1
499	-	164	0	-	168	-	0.12693	-	1
500	-	164	0	-	168	-	0.12693	-	1
501	-	164	0	-	168	-	0.12693	-	1
502	-	164	0	-	168	-	0.12693	-	1
503	F	165	0.7452	F	169	F	1.43744	F	1
504	-	165	0.67695	-	169	-	0.12693	-	1		πXXXXπ
505	Y	166	1.05018	Y	170	Y	1.20192	Y	1
506	K	167	0.937	K	171	S	1.78254	S	0
507	G	168	0.78242	G	172	G	0.50286	G	1	Helix4
508	I	169	0.86658	L	173	F	1.4583	L	1	Helix4
509	V	170	1.47993	V	174	T	2.15766	P	0	Helix4
510	P	171	0	P	175	P	1.20464	P	1	Helix4
511	L	172	0.11925	L	176	I	1.30309	I	0	Helix4
512	W	173	0.11925	W	177	L	1.21813	L	0	Helix4
513	C	174	1.79425	G	178	F	2.04642	A	0	Helix4
514	R	175	0	R	179	K	0.47244	K	0	Helix4	πXXXXπ		EVEN Motif 1B
515	Q	176	0.11925	Q	180	Q	0.58797	Q	1	Helix4
516	I	177	0.32015	I	181	I	0.89292	V	0	Helix4
517	P	178	0	P	182	P	0.61913	P	1	Helix4
518	Y	179	0.23782	Y	183	Y	0.61343	Y	1	Helix4
519	T	180	0.23782	T	184	N	1.11824	T	1	Helix4
520	M	181	0.86658	M	185	I	1.53834	M	1	Helix4
521	C	182	1.26239	M	186	A	1.63464	A	0	Helix4
522	K	183	0.23782	K	187	K	0.57235	K	1	Helix4
523	F	184	0	F	188	F	0.9994	F	1	Helix4
524	T	185	1.45071	A	189	L	1.63235	V	0	Helix4
525	S	186	1.71852	F	190	V	1.44488	V	0	Helix4
526	F	187	0.11925	F	191	F	1.46134	F	1	Helix4	(Y/F)(D/E)XX(R/K)	F	EVEN Motif 2A
527	E	188	0.11925	E	192	E	1.39178	E	1	Helix4		E
528	K	189	1.78465	K	193	R	2.50771	V	0	Helix4		X
529	I	190	1.47526	I	194	A	1.71139	A	0	Helix4		X
530	V	191	0.5893	V	195	S	1.98904	A	0	Helix4		R/K
531	Q	192	1.12956	E	196	E	1.97344	E	1	Helix4
532	K	193	1.87834	L	197	F	2.37573	A	0
533	I	194	1.30973	F	198	Y	1.59053	I	0
534	-	194	0	-	198	-	0.25307	-	1
535	-	194	0	-	198	-	0.25307	-	1
536	Y	195	0	Y	199	Y	1.14638	Y	1
537	-	195	0	-	199	-	0.12693	-	1
538	-	195	0	-	199	-	0.12693	-	1
539	-	195	0	-	199	-	0.12693	-	1
540	-	195	0	-	199	-	0.12693	-	1
541	-	195	0	-	199	-	0.37839	-	1
542	-	195	0	-	199	-	0.37839	-	1
543	-	195	1.74963	K	199	-	1.27974	-	0
544	S	196	1.64848	Y	199	-	2.34424	A	0
545	V	197	1.09579	V	200	G	2.29871	A	0
546	L	198	1.5046	F	201	F	2.2594	F	1
547	P	199	0.89507	T	202	A	1.85499	G	0
548	K	200	1.70945	K	203	G	2.21468	K	1
549	-	200	0	-	203	-	0.62647	-	1
550	-	200	0	-	203	-	0.50286	-	1
551	-	200	0	-	203	-	0.37839	-	1
552	-	200	0	-	203	-	0.37839	-	1
553	K	201	0.47286	P	204	P	2.26566	P	1
554	K	202	0.63651	K	205	K	1.91781	K	1
555	E	203	1.48558	D	206	E	2.29089	E	0
556	E	204	1.57716	E	207	K	2.08891	D	0
557	M	205	0.88673	Y	208	L	2.38467	L	0
558	N	206	0.62047	S	209	S	2.11946	S	1
559	A	207	0.11925	K	210	S	2.43262	K	1
560	L	208	1.86716	G	211	T	2.18511	S	0
561	Q	209	1.6452	T	212	S	2.28145	-	0
562	-	209	0	-	212	-	0.12693	-	1
563	-	209	0	-	212	-	0.25307	-	1
564	-	209	0	-	212	-	0.25307	-	1
565	-	209	0	-	212	-	0.25307	-	1
566	Q	210	0.11925	Q	213	T	1.87462	-	0
567	-	210	0	-	213	-	0.33988	-	1
568	I	211	0.23782	L	214	T	1.68469	L	1
569	S	212	1.15223	G	215	L	2.07357	A	0	Helix5
570	V	213	0.66628	V	216	L	0.96416	V	1	Helix5
571	S	214	0.6207	T	217	N	1.44644	S	0	Helix5
572	F	215	0.23782	F	218	L	0.95761	L	0	Helix5
573	V	216	1.35577	A	219	L	1.99153	G	0	Helix5
574	G	217	1.02484	S	220	S	1.17997	S	1	Helix5		π	ODD Motif 3A
575	G	218	0	G	221	G	0.56234	G	1	Helix5	πGπxπGπ	G
576	Y	219	0	Y	222	L	1.89686	L	0	Helix5		π
577	L	220	1.30839	I	223	T	1.68097	I	1	Helix5		x
578	-	220	0	-	223	-	0.12693	-	1
579	A	221	0.27119	A	224	A	0.55665	A	1	Helix5		π
580	G	222	0	G	225	G	0.73408	G	1	Helix5		G
581	I	223	0.85285	V	226	L	1.63196	V	1	Helix5		π
582	L	224	1.27323	F	227	A	1.81189	A	0	Helix5
583	C	225	0.23782	C	228	A	0.6155	A	0	Helix5
584	A	226	0.3557	A	229	A	1.07129	A	1	Helix5
585	A	227	1.1226	I	230	I	1.10183	I	1	Helix5
586	V	228	0.27119	V	231	V	1.61706	V	1	Helix5
587	S	229	0	S	232	S	0	S	1	Helix5
588	H	230	0.38836	H	233	Q	0.84281	Q	0	Helix5
589	P	231	0	P	234	P	0	P	1	Helix5	PX(D/E)XX(R/K)	P	ODD Motif 3B
590	A	232	0.11925	A	235	A	0.65405	A	1	Helix5		X
591	D	233	0	D	236	D	0	D	1	Helix5		D
592	V	234	1.36908	T	237	T	1.34912	T	1	Helix5		X
593	M	235	1.29016	L	238	L	1.1585	L	1	Helix5		X
594	V	236	0.44711	V	239	L	0.50286	L	0	Helix5		R/K
595	S	237	0	S	240	S	0.61343	S	1	Helix5
596	K	238	1.73027	K	241	K	1.70772	K	1	Helix5
597	I	239	0.96041	L	242	V	1.69508	I	0	Helix5
598	-	239	0.51821	-	243	N	0.12693	-	1
599	-	239	0.38296	-	244	K	0.12693	-	1
600	-	239	0	-	244	-	0	-	1
601	-	239	0	-	244	-	0	-	1
602	-	239	0	-	244	-	0	-	1
603	-	239	0	-	244	-	0	-	1
604	-	239	0	-	244	-	0	-	1
605	-	239	0	-	244	-	0	-	1
606	-	239	0	-	244	-	0	-	1
607	-	239	0	-	244	-	0	-	1
608	-	239	0	-	244	-	0	-	1
609	-	239	0	-	244	-	0	-	1
610	-	239	0	-	244	-	0.12693	-	1
611	-	239	0	-	244	-	0.12693	-	1
612	-	239	0	-	244	-	0.12693	-	1
613	-	239	0	-	244	-	0.25307	-	1
614	-	239	0	-	244	-	0.37839	-	1
615	-	239	0	-	244	-	0.37839	-	1
616	-	239	0	-	244	-	0.33988	-	1
617	-	239	0	-	244	-	0.46436	-	1
618	-	239	0	-	245	T	0.71068	-	1
619	-	239	0.11925	-	246	K	1.32863	-	1
620	N	240	0.3557	-	247	K	1.36895	-	1	Helix5
621	S	241	0.47286	-	248	A	1.90183	-	1	Helix5
622	E	242	0.43732	-	249	P	1.98717	G	0	Helix5
623	R	243	0.69983	-	250	G	2.15841	A	0	Helix5
624	K	244	1.47112	-	251	Q	2.09762	G	0	Helix5
625	A	245	1.31233	-	252	S	2.15259	G	0	Helix5
626	N	246	1.73289	N	253	T	2.25193	S	0	Helix5
627	E	247	1.98498	E	254	V	1.60082	G	0	Helix5
628	S	248	1.87777	N	255	G	1.94704	S	0
629	-	248	0	-	255	-	0.71068	-	1
630	-	248	0	-	255	-	0.71068	-	1
631	-	248	0	-	255	-	0.67217	-	1
632	-	248	0	-	255	-	0.71068	-	1
633	-	248	0	-	255	-	0.71068	-	1
634	M	249	1.37349	K	256	L	2.48566	L	0
635	S	250	0.66943	G	257	L	2.16865	G	1
636	V	251	1.48358	K	258	A	2.02406	S	0
637	A	252	1.51551	S	259	Q	1.95804	R	0
638	-	252	0	-	259	-	0.12693	-	1
639	-	252	0	-	259	-	0.25307	-	1
640	S	253	1.80859	V	260	L	1.92563	L	0
641	K	254	1.6453	G	261	A	2.37412	A	0
642	-	254	0	-	261	-	0.37839	-	1
643	-	254	0	-	261	-	0.37839	-	1
644	R	255	1.91615	Q	261	-	2.05822	N	0
645	-	255	0	-	261	-	0.50286	-	1
646	-	255	0	-	261	-	0.50286	-	1
647	-	255	0	-	261	-	0.50286	-	1
648	-	255	0	-	261	-	0.50286	-	1
649	-	255	0	-	261	-	0.50286	-	1
650	I	256	1.36777	I	261	-	1.45117	I	1
651	Y	257	1.4961	A	261	-	1.87052	A	1
652	-	257	0.23782	-	261	-	0.46436	-	1
653	Q	258	1.28826	K	262	K	1.83773	K	1
654	-	258	0.11925	-	262	-	0.12693	-	1
655	-	258	0.11925	-	262	-	0.12693	-	1
656	-	258	0.11925	-	262	-	0.12693	-	1
657	-	258	0.11925	-	262	-	0.12693	-	1
658	-	258	0.11925	-	262	-	0.12693	-	1
659	-	258	0.11925	-	262	-	0.12693	-	1
660	K	259	1.90638	E	263	Q	1.97151	E	1
661	I	260	1.71053	L	264	L	2.2286	L	1	Helix6
662	G	261	0	G	265	G	0.37839	G	1	Helix6
663	F	262	1.96108	F	266	F	2.00487	P	0	Helix6
664	T	263	2.19252	K	267	F	2.0504	R	0	Helix6
665	G	264	1.06491	G	268	G	1.35297	G	1	Helix6
666	L	265	0.64215	L	269	S	1.27974	L	1	Helix6
667	-	265	1.36345	-	269	-	0.69318	-	1
668	W	266	1.11644	T	270	F	1.50927	F	0	Helix6
669	N	267	1.3482	K	271	A	1.91313	L	0	Helix6
670	G	268	0.11925	G	272	G	0.12693	G	1	Helix6
671	L	269	0.40177	L	273	L	1.11492	L	1	Helix6
672	M	270	1.62556	G	274	P	2.20463	G	1	Helix6
673	V	271	1.50874	T	275	T	1.55681	A	0	Helix6
674	R	272	0	R	276	R	0.12693	R	1	Helix6	πXXXXπ	π	EVEN Motif 3B
675	I	273	0.50743	I	277	L	1.75439	C	0	Helix6		X
676	V	274	1.43706	I	278	V	1.28346	V	0	Helix6		X
677	M	275	0.11925	M	279	M	1.39214	M	1	Helix6		X
678	I	276	0.38836	I	280	V	1.66017	V	0	Helix6		X
679	G	277	0	G	281	G	1.31891	G	1	Helix6		π
680	T	278	0.11925	T	282	T	1.85276	T	1	Helix6
681	L	279	0.23782	L	283	L	1.11203	L	1	Helix6
682	T	280	0.20227	T	284	T	1.26625	T	1	Helix6
683	S	281	0.76416	G	285	S	1.34831	A	0	Helix6
684	F	282	0.7716	L	286	L	1.45203	G	0	Helix6
685	Q	283	0	Q	287	Q	0.25307	Q	1	Helix6
686	W	284	0	W	288	F	0.64954	F	0	Helix6
687	L	285	1.31088	W	289	G	1.67757	L	0	Helix6
688	I	286	0.51821	I	290	I	1.00892	I	1	Helix6
689	Y	287	0.11925	Y	291	Y	0.61343	Y	1	Helix6	(Y/F)(D/E)XX(R/K)	Y	EVEN Motif 3A
690	D	288	0.11925	D	292	G	0.88811	D	1	Helix6		D
691	S	289	1.328	S	293	S	2.56268	S	1	Helix6		X
692	F	290	1.26665	F	294	L	1.53147	V	0	Helix6		X
693	K	291	0	K	295	K	1.09264	K	1	Helix6		K
694	A	292	1.1458	V	296	S	2.33672	Q	0
695	Y	293	1.96876	A	297	T	2.08604	A	1
696	-	293	0	-	297	-	0.12693	-	1
697	V	294	1.73868	M	298	L	1.3365	L	0
698	G	295	0.54423	G	299	G	0.83247	G	1
699	L	296	0.97423	L	300	C	1.68643	A	0
700	P	297	0.9471	P	301	P	2.14866	P	1
701	T	298	1.02204	T	302	P	1.95053	A	0
702	T	299	1.0807	T	303	T	1.92853	T	1
703	G	300	0.65262	G	304	I	1.94462	G	1
704	-	300	1.11628	G	305	E	2.06686	E	0
705	-	300	2.06301	P	306	I	1.79582	-	0
706	-	300	1.96406	E	307	G	2.04959	-	0
707	-	300	1.89577	M	308	G	1.81667	-	0
708	-	300	1.53561	P	309	G	1.92257	-	0
709	-	300	1.95344	K	310	G	1.87941	-	0
710	-	300	1.86719	-	311	H	1.77722	-	1
711	-	300	1.7682	-	311	-	1.41046	-	1
712	-	300	1.41058	-	311	-	1.17962	-	1
713	-	300	1.68942	-	311	-	1.06188	-	1
714	-	300	1.31233	-	311	-	0.86175	-	1
715	-	300	1.67746	-	311	-	0.90025	-	1
716	-	300	1.59765	-	311	-	0.9533	-	1
717	-	300	1.13301	-	311	-	0.83247	-	1
718	-	300	1.04452	-	311	-	0.67217	-	1
719	-	300	0.9272	-	311	-	0.58797	-	1
720	-	300	0.70498	-	311	-	0.58797	-	1
721	-	300	0.43732	-	311	-	0.50286	-	1
722	-	300	0.23782	-	311	-	0.46436	-	1
723	-	300	0.23782	-	311	-	0.46436	-	1
724	-	300	0.11925	-	311	-	0.50286	-	1
725	-	300	0	-	311	-	0.46436	-	1
726	-	300	0	-	311	-	0.37839	-	1
727	-	300	0	-	311	-	0.33988	-	1
728	-	300	0	-	311	-	0.37839	-	1
729	-	300	0	-	311	-	0.25307	-	1
730	-	300	0	-	311	-	0.25307	-	1
731	-	300	0	-	311	-	0.25307	-	1
732	-	300	0	-	311	-	0.12693	-	1
733	-	300	0	-	311	-	0.12693	-	1
734	-	300	0	-	311	-	0.12693	-	1
735	-	300	0	-	311	-	0.12693	-	1
736	-	300	0	-	311	-	0.12693	-	1
737	-	300	0	-	311	-	0.12693	-	1

## Sheet: Modelled structure
PIC2 modelled in the c-state
Helix1	Black
Helix2	Pink
Helix3	Orange
Helix4	Blue
Helix5	Red
Helix6	Green

## Sheet: Mutants
Mutant	F Oligo	R Oligo
C21A	CGAAAGAGTTTTATGCCACAGCTACCTTAGGTGGTATAATTG	CAATTATACCACCTAAGGTAGCTGTGGCATAAAACTCTTTCG
C29A	CTTAGGTGGTATSSTTGCGGCTGGTCCAACACATTCTTCG	CGAAGAATGTGTTGGACCAGCCGCAATTATACCACCTAAG
H33A	CGTGCGGTCCAACAGCTTCTTCGATCACTCC	GGAGTGATCGAAGAAGCTGTTGGACCGCACG
C44A	CCACTAGATCTTGTCAAAGCAAGGCTAC	GGATTGACCTGTAGCCTTGCTTTGACAAG
C225A	CTGGCAGGTATATTAGCTGCTGCAGTCTCAC	GTGAGACTGCAGCAGCTAATATACCTGCCAG
Q47A	GATCTTGTCAAATGTAGGCTAGCGGTCAATCCCAAGTTGTATAC	GTATACAACTTGGGATTGACCGCTAGCCTACATTTGACAAGATC
V48A	CAAATGTAGGCTACAGGCCAATCCCAAGTTGTATAC	GTATACAACTTGGGATTGGCCTGTAGCCTACATTTG
Q86A	TTCGTCGGATATTCGCTAGCAGGTGCAG	ACCATACTTACCTGCACCTGCTAGCGAAT
K90A	TCGCTACAAGGTGCAGGTGCATATGGTG	ATACTCATAACCACCATATGCACCTGCAC
D124A	CTGAATTCCTCGCTGCTATCATGTTGTGCC	GGCACAACATGATAGCAGCGAGGAATTCAG
L127A	CTCGCTGATATCATGGCGTGCCCATTTGAAG	CTTCAAATGGGCACGCCATGATATCAGCGA
Q176A	GTTCCCCTATGGTGCAGAGCAATTCCTTA	ACACATTGTGTAAGGAATTGCTCTGCACC
G268A	CTTTACTGGGTTGTGGAATGCGTTAATGGTGAGAATTGTC	GACAATTCTCACCATTAACGCATTCCACAACCCAGTAAAG
M175A	TTAATGGTGAGAATTGTCGCAATCGGTAC	ACTTGTCAAAGTACCGATTGCGACAATTC
